# Supplementary material for: Gene-Expression Profiling Suggests Impaired Signaling via the Interferon Pathway in Cstb-/- Microglia
Source: PubMed Central journal article supplement (PMC4927094; doi:10.1371/journal.pone.0158195), 2016-06-29

**A**

microarray

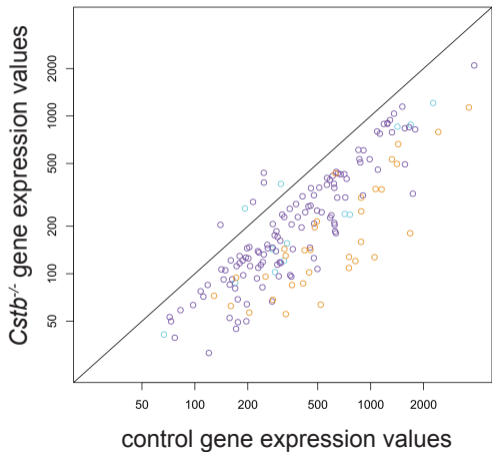**B**

RNA-seq

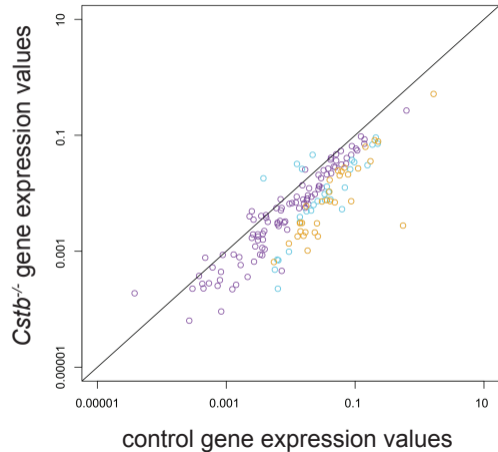

Supplement: pone.0158195.s001.pdf [file pone.0158195.s001.pdf]
