# Supplementary material for: Gene-Expression Profiling Suggests Impaired Signaling via the Interferon Pathway in Cstb-/- Microglia
Source: PubMed Central journal article supplement (PMC4927094; doi:10.1371/journal.pone.0158195), 2016-06-29

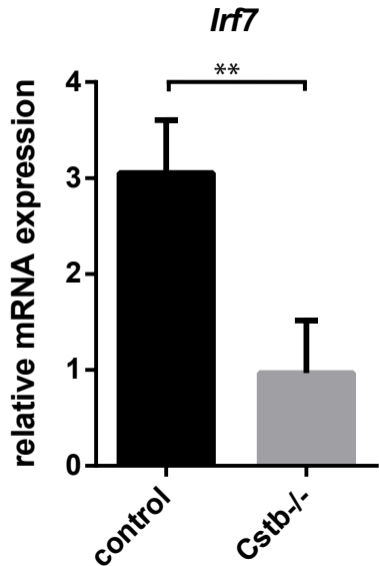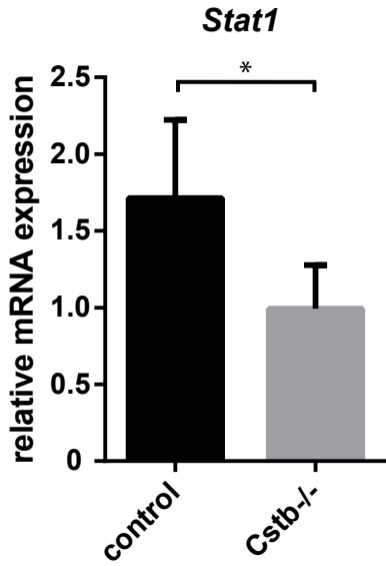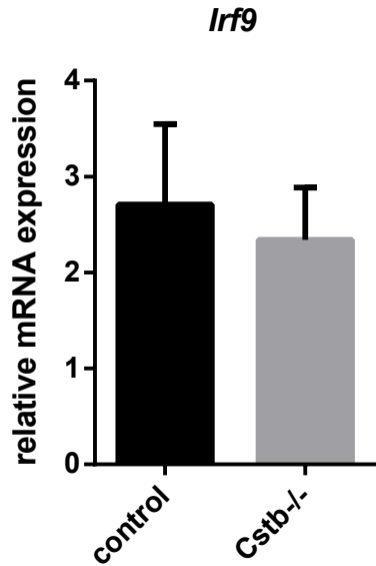

Supplement: pone.0158195.s003.pdf [file pone.0158195.s003.pdf]
