# Supplementary material for: Gene-Expression Profiling Suggests Impaired Signaling via the Interferon Pathway in Cstb-/- Microglia
Source: PubMed Central journal article supplement (PMC4927094; doi:10.1371/journal.pone.0158195), 2016-06-29
Supplement: pone.0158195.s004.pdf [file pone.0158195.s004.pdf]

**Supplementary Table 1: Transcripts differentially expressed in *Cstb*<sup>-/-</sup> microglia.**

In the microarray experiment, genes with an absolute fold change (FC)  $\geq 1.3$  and a p-value  $< 0.05$  were considered differentially expressed and in the RNA-seq analysis a local false discovery rate (FDR)  $< 0.01$  was used as cutoff. Genes are sorted by FC identified in the microarray analysis and asterisks (\*) mark genes differentially expressed in the results of both methods.

| Gene Symbol                                | TC ID   | microarray |          | RNA-seq |           |
|--------------------------------------------|---------|------------|----------|---------|-----------|
|                                            |         | FC         | p-value  | FC      | Local FDR |
| <i>Cstb</i> *                              | 6769080 | -9.3       | 2.11E-06 | -200.2  | 3.26E-16  |
| <i>Ifit1</i> *                             | 6869334 | -8.1       | 2.24E-02 | -11.2   | 9.24E-14  |
| <i>Ifit3</i> *                             | 6869327 | -7.5       | 3.06E-02 | -8.5    | 7.49E-13  |
| <i>Slfn5</i> *                             | 6782979 | -6.7       | 2.24E-02 | -14.7   | 1.10E-16  |
| <i>Oasl2</i> *                             | 6933625 | -6.6       | 2.29E-02 | -17.9   | 1.85E-09  |
| <i>Rtp4</i> *                              | 6840129 | -5.8       | 2.24E-02 | -6.9    | 4.17E-11  |
| <i>Mx1</i> *                               | 6848199 | -5.5       | 3.26E-02 | -6.9    | 2.14E-08  |
| <i>Irf7</i> *                              | 6972192 | -5.3       | 2.29E-02 | -5.6    | 5.17E-10  |
| <i>Mnda</i>   <i>Ifi204</i>   <i>Mndal</i> | 6764246 | -5.3       | 2.24E-02 | n.d.    | n.d.      |
| <i>Oas2</i>                                | 6941647 | -4.5       | 2.24E-02 | -3.8    | n.s.      |
| <i>Oasl1</i> *                             | 6933627 | -4.5       | 3.41E-02 | -7.1    | 4.19E-08  |
| <i>Ifit2</i> *                             | 6869324 | -4.1       | 4.25E-02 | -8.0    | 9.91E-09  |
| <i>Zbp1</i> *                              | 6893556 | -4.0       | 3.26E-02 | -8.6    | 9.33E-07  |
| <i>Rsad2</i> *                             | 6799525 | -3.9       | 2.81E-02 | -6.4    | 2.88E-07  |
| <i>Saa3</i> *                              | 6967059 | -3.9       | 4.56E-02 | -4.9    | 7.83E-06  |
| <i>Ms4a4c</i>                              | 6868091 | -3.9       | 3.93E-02 | -3.2    | n.s.      |
| <i>Ifi205</i>                              | 6764243 | -3.8       | 3.46E-02 | n.d.    | n.d.      |
| <i>Mx2</i>                                 | 6843550 | -3.7       | 2.81E-02 | n.d.    | n.d.      |
| <i>D14Erttd668e</i>   <i>Phf11</i>         | 6828125 | -3.7       | 2.50E-02 | n.d.    | n.d.      |
| <i>Pyhin1</i>                              | 6764231 | -3.6       | 4.24E-02 | -2.5    | n.s.      |
| <i>Clec4a1</i>                             | 6949722 | -3.6       | n.s.     | -4.1    | 7.62E-03  |
| <i>Emr4</i>                                | 6851186 | -3.5       | 2.81E-02 | -4.2    | n.s.      |
| <i>Gbp6</i>                                | 6901950 | -3.5       | 4.24E-02 | -4.2    | n.s.      |
| <i>Ifi202b</i>                             | 6764289 | -3.4       | 2.24E-02 | -1.9    | n.s.      |
| <i>Phf11</i>                               | 6825096 | -3.4       | 3.16E-02 | -3.8    | n.s.      |
| <i>Dhx58</i>                               | 6791437 | -3.4       | 2.30E-02 | n.d.    | n.d.      |
| <i>Gbp2</i> *                              | 6901957 | -3.4       | 4.24E-02 | -4.9    | 2.21E-04  |
| <i>Ddx58</i> *                             | 6920954 | -3.3       | 2.24E-02 | -3.7    | 4.48E-06  |
| <i>Ifi44</i> *                             | 6910592 | -3.2       | 1.55E-03 | -4.8    | 3.14E-09  |
| <i>Clec4a3</i>                             | 6949727 | -3.2       | n.s.     | -3.6    | 9.55E-05  |
| <i>Rnf213</i>                              | 6785384 | -3.2       | 2.24E-02 | -1.6    | n.s.      |
| <i>Ifi2712a</i> *                          | 6803210 | -3.1       | 2.56E-02 | -3.2    | 7.83E-06  |
| <i>Parp14</i> *                            | 6845375 | -3.1       | 2.24E-02 | -4.2    | 4.19E-08  |
| <i>Lgals3bp</i> *                          | 6792657 | -3.1       | 2.24E-02 | -3.7    | 8.17E-16  |
| <i>Lcn2</i>                                | 6885873 | -3.0       | 2.45E-02 | -15.9   | n.s.      |
| <i>Ifih1</i>                               | 6887196 | -3.0       | 2.45E-02 | -2.5    | n.s.      |
| <i>Sp100</i> *                             | 6751219 | -3.0       | 2.81E-02 | -2.6    | 1.27E-04  |
| <i>Cmpk2</i>                               | 6793961 | -3.0       | 3.93E-02 | -5.6    | n.s.      |
| <i>Cxcl10</i>                              | 6939990 | -3.0       | 3.26E-02 | -2.4    | n.s.      |
| <i>Oas1a</i>   <i>Oas1g</i>                | 6941657 | -2.9       | 2.24E-02 | n.d.    | n.d.      |
| <i>Dtx3l</i>                               | 6845377 | -2.9       | 2.71E-02 | -2.4    | n.s.      |

|                                    |         |      |          |      |          |
|------------------------------------|---------|------|----------|------|----------|
| <i>Irgm1*</i>                      | 6787896 | -2.9 | 2.50E-02 | -2.9 | 5.75E-03 |
| <i>Samd9l</i>                      | 6951281 | -2.9 | 3.49E-02 | -6.0 | n.s.     |
| <i>Igtp Gm12250 Irgm2</i>          | 6781248 | -2.9 | 3.08E-02 | n.d. | n.d.     |
| <i>Stat1*</i>                      | 6749376 | -2.8 | 2.29E-02 | -4.2 | 3.06E-13 |
| <i>Aoah</i>                        | 6805180 | -2.7 | 4.56E-02 | -2.3 | n.s.     |
| <i>Trim34</i>                      | 6963137 | -2.6 | 2.29E-02 | n.d. | n.d.     |
| <i>Ccl5*</i>                       | 6790288 | -2.6 | 2.46E-02 | -4.6 | 2.69E-04 |
| <i>Isg20</i>                       | 6961896 | -2.6 | n.s.     | -9.2 | 2.88E-03 |
| <i>BC006779</i>                    | 6894274 | -2.6 | 2.29E-02 | -2.3 | n.s.     |
| <i>Epsti1</i>                      | 6820472 | -2.6 | 2.56E-02 | -2.9 | n.s.     |
| <i>Slfn8*</i>                      | 6790244 | -2.5 | 2.24E-02 | -4.6 | 3.85E-03 |
| <i>Stat2</i>                       | 6771641 | -2.5 | 2.29E-02 | -2.3 | n.s.     |
| <i>Il1b</i>                        | 6890838 | -2.5 | 2.29E-02 | -2.5 | n.s.     |
| <i>Clec2d</i>                      | 6950125 | -2.5 | 3.60E-02 | -2.5 | n.s.     |
| <i>Oas1b*</i>                      | 6933997 | -2.5 | 4.25E-02 | -8.4 | 1.99E-03 |
| <i>Tor3a*</i>                      | 6763273 | -2.5 | 2.24E-02 | -2.5 | 1.32E-03 |
| <i>Parp9*</i>                      | 6840734 | -2.5 | 2.29E-02 | -2.4 | 9.12E-03 |
| <i>Apoc1</i>                       | 6973586 | -2.4 | n.s.     | -5.1 | 4.46E-10 |
| <i>Parp12</i>                      | 6952926 | -2.4 | 2.24E-02 | n.d. | n.d.     |
| <i>P2ry14</i>                      | 6905408 | -2.4 | 3.67E-02 | -1.6 | n.s.     |
| <i>C3</i>                          | 6856290 | -2.4 | 4.82E-02 | -3.6 | n.s.     |
| <i>Eif2ak2</i>                     | 6857435 | -2.3 | 2.24E-02 | -2.4 | n.s.     |
| <i>Ube2l6*</i>                     | 6878709 | -2.3 | 3.23E-02 | -2.2 | 4.11E-03 |
| <i>Bst2*</i>                       | 6983265 | -2.2 | 3.74E-02 | -2.9 | 8.36E-07 |
| <i>Trim30</i>                      | 6970065 | -2.2 | 2.55E-02 | n.d. | n.d.     |
| <i>Slfn2*</i>                      | 6782988 | -2.2 | 2.24E-02 | -2.3 | 8.50E-04 |
| <i>Gvin1 Gm8979</i>                | 6970164 | -2.1 | 2.81E-02 | n.d. | n.d.     |
| <i>H2-T10 H2-T22 H2-T23 H2-T24</i> | 6855152 | -2.1 | 2.29E-02 | n.d. | n.d.     |
| <i>Cyp27a1</i>                     | 6750566 | -2.1 | n.s.     | -3.6 | 2.54E-03 |
| <i>Slfn10-ps</i>                   | 6790245 | -2.1 | 2.29E-02 | -1.1 | n.s.     |
| <i>Ccrl2</i>                       | 6998919 | -2.1 | 2.74E-02 | -3.0 | n.s.     |
| <i>Tap1</i>                        | 6850019 | -2.1 | 3.15E-02 | -2.0 | n.s.     |
| <i>Uba7 Cdh29 Cdhr4</i>            | 6992280 | -2.1 | 3.23E-02 | n.d. | n.d.     |
| <i>Slfn9</i>                       | 6790239 | -2.0 | 2.38E-02 | -2.9 | n.s.     |
| <i>Sepp1</i>                       | 6828326 | -2.0 | n.s.     | -2.3 | 1.30E-04 |
| <i>Pml</i>                         | 6995964 | -2.0 | 2.84E-02 | 1.3  | n.s.     |
| <i>Ms4a7</i>                       | 6871545 | -2.0 | 4.68E-02 | -1.9 | n.s.     |
| <i>Lgals9</i>                      | 6790012 | -2.0 | 2.81E-02 | -2.0 | n.s.     |
| <i>Cxcl13</i>                      | 6932571 | -1.9 | n.s.     | -3.1 | 2.80E-04 |
| <i>Casp4</i>                       | 6986649 | -1.9 | 3.06E-02 | n.d. | n.d.     |
| <i>Parp10</i>                      | 6836806 | -1.9 | 2.50E-02 | -2.1 | n.s.     |
| <i>Trim25</i>                      | 6783439 | -1.9 | 3.06E-02 | -1.7 | n.s.     |
| <i>Irf1</i>                        | 6780996 | -1.9 | 4.21E-02 | -2.5 | n.s.     |
| <i>Ly6e</i>                        | 6831538 | -1.9 | 3.60E-02 | -2.3 | n.s.     |
| <i>Tmem140</i>                     | 6945339 | -1.9 | 4.56E-02 | -2.4 | n.s.     |
| <i>Fcgr1</i>                       | 6907262 | -1.9 | 3.93E-02 | -2.0 | n.s.     |
| <i>Zufsp</i>                       | 6773158 | -1.9 | 4.24E-02 | -1.6 | n.s.     |
| <i>Abca1</i>                       | 6921670 | -1.9 | 2.71E-02 | -9.1 | n.s.     |
| <i>Cd83</i>                        | 6806640 | -1.8 | n.s.     | -3.5 | 1.41E-04 |
| <i>Timd4</i>                       | 6780572 | -1.8 | 3.49E-02 | -2.1 | n.s.     |

|                                   |         |      |          |       |          |
|-----------------------------------|---------|------|----------|-------|----------|
| <i>Abcg1</i>                      | 6849766 | -1.8 | 4.56E-02 | -2.4  | n.s.     |
| <i>Trex1*</i>                     | 6998741 | -1.8 | 2.24E-02 | -2.4  | 1.65E-04 |
| <i>Map3k8</i>                     | 6863048 | -1.8 | 4.65E-02 | n.d.  | n.d.     |
| <i>lkbke</i>                      | 6762151 | -1.8 | 4.56E-02 | -1.4  | n.s.     |
| <i>Gpr18</i>                      | 6827943 | -1.8 | n.s.     | -8.7  | 7.50E-05 |
| <i>Gdap10</i>                     | 6794294 | -1.8 | 2.81E-02 | n.d.  | n.d.     |
| <i>Isg15*</i>                     | 6927363 | -1.8 | 3.93E-02 | -11.9 | 1.67E-19 |
| <i>9930111J21Rik2</i>             | 6787925 | -1.7 | 4.68E-02 | n.d.  | n.d.     |
| <i>Ifi35</i>                      | 6784270 | -1.7 | 2.55E-02 | -1.9  | n.s.     |
| <i>Adar</i>                       | 6899262 | -1.7 | 2.24E-02 | -1.7  | n.s.     |
| <i>Fbxw17</i>                     | 6806991 | -1.7 | 4.53E-02 | -2.1  | n.s.     |
| <i>Trim14</i>                     | 6921379 | -1.7 | 4.83E-02 | -1.4  | n.s.     |
| <i>Slc39a4</i>                    | 6836839 | -1.7 | 3.93E-02 | -2.0  | n.s.     |
| <i>Tapbp</i>                      | 6849990 | -1.7 | 3.63E-02 | -1.8  | n.s.     |
| <i>Psmb9</i>                      | 6855013 | -1.7 | 3.60E-02 | -1.8  | n.s.     |
| <i>P2rx4</i>                      | 6934164 | -1.7 | n.s.     | -2.4  | 2.96E-03 |
| <i>Mov10</i>                      | 6907869 | -1.7 | 3.60E-02 | -1.5  | n.s.     |
| <i>Arid5b</i>                     | 6774719 | -1.7 | 2.38E-02 | -1.9  | n.s.     |
| <i>Nampt</i>                      | 6794293 | -1.7 | 2.29E-02 | -2.0  | n.s.     |
| <i>Phyhd1 Lrrc8a</i>              | 6876052 | -1.6 | 4.81E-02 | n.d.  | n.d.     |
| <i>Car13</i>                      | 6895838 | -1.6 | 4.53E-02 | -2.2  | n.s.     |
| <i>H2-gs10</i>                    | 6850155 | -1.6 | 3.88E-02 | -1.0  | n.s.     |
| <i>Trafd1</i>                     | 6941672 | -1.6 | 3.06E-02 | -1.6  | n.s.     |
| <i>H2-T22 H2-T10 H2-T9</i>        | 7005505 | -1.6 | 3.67E-02 | n.d.  | n.d.     |
| <i>Irf9</i>                       | 6819258 | -1.6 | 3.46E-02 | -1.6  | n.s.     |
| <i>H2-T10</i>                     | 6855155 | -1.6 | 3.60E-02 | 5.0   | n.s.     |
| <i>Nod1</i>                       | 6953800 | -1.6 | 4.56E-02 | -1.5  | n.s.     |
| <i>Tmcc3</i>                      | 6769928 | -1.6 | 4.90E-02 | -1.0  | n.s.     |
| <i>Sult1a1</i>                    | 6971280 | -1.5 | n.s.     | -28.1 | 2.18E-03 |
| <i>1600014C10Rik</i>              | 6959968 | -1.5 | 4.56E-02 | -2.2  | n.s.     |
| <i>Tnfaip3</i>                    | 6772417 | -1.5 | 1.96E-02 | -2.9  | n.s.     |
| <i>Blnk</i>                       | 6873111 | -1.5 | 4.81E-02 | -1.6  | n.s.     |
| <i>Prdm1</i>                      | 6773655 | -1.5 | 2.29E-02 | -2.0  | n.s.     |
| <i>Optn</i>                       | 6884446 | -1.5 | 2.55E-02 | -1.8  | n.s.     |
| <i>Rxrg</i>                       | 6754900 | -1.5 | 3.26E-02 | -1.5  | n.s.     |
| <i>Sass6</i>                      | 6900713 | -1.5 | 3.05E-02 | 1.2   | n.s.     |
| <i>Stard3</i>                     | 6783998 | -1.5 | 3.60E-02 | -1.3  | n.s.     |
| <i>Rnf114</i>                     | 6883320 | -1.5 | 4.56E-02 | -1.8  | n.s.     |
| <i>Slc29a3</i>                    | 6774309 | -1.5 | 3.88E-02 | -1.3  | n.s.     |
| <i>Trim12 9230105E10Rik Trim5</i> | 6970053 | -1.5 | 3.88E-02 | n.d.  | n.d.     |
| <i>Tor1aip1*</i>                  | 6763240 | -1.5 | 3.05E-02 | -2.8  | 1.04E-03 |
| <i>Ptger4</i>                     | 6833640 | -1.5 | 2.50E-02 | -2.0  | n.s.     |
| <i>Chmp4b</i>                     | 6882476 | -1.5 | 3.92E-02 | -5.4  | n.s.     |
| <i>Ankle2</i>                     | 6933409 | -1.4 | 3.49E-02 | n.d.  | n.d.     |
| <i>Ftsjd2</i>                     | 6849665 | -1.4 | 2.29E-02 | -1.4  | n.s.     |
| <i>Cds1</i>                       | 6932930 | -1.4 | 4.98E-02 | n.d.  | n.d.     |
| <i>Tmem219</i>                    | 6971307 | -1.4 | 3.60E-02 | -1.4  | n.s.     |
| <i>Cd22</i>                       | 6966322 | -1.4 | 4.49E-02 | -1.7  | n.s.     |
| <i>Tnfrsf26</i>                   | 6972411 | -1.4 | 4.56E-02 | 1.6   | n.s.     |
| <i>Cnot6l</i>                     | 6940146 | -1.4 | 3.45E-02 | 1.1   | n.s.     |

|                    |         |      |          |       |          |
|--------------------|---------|------|----------|-------|----------|
| <i>Pvrl4</i>       | 6755175 | -1.4 | 4.48E-02 | -4.1  | n.s.     |
| <i>Ogfr</i>        | 6884183 | -1.4 | 2.81E-02 | -1.1  | n.s.     |
| <i>Gab2</i>        | 6962745 | -1.4 | 4.47E-02 | -1.3  | n.s.     |
| <i>Sdc3</i>        | 6917389 | -1.4 | 4.56E-02 | -1.9  | n.s.     |
| <i>Ly9</i>         | 6764089 | -1.4 | 4.56E-02 | -1.1  | n.s.     |
| <i>Cd86</i>        | 6845435 | -1.4 | 4.56E-02 | -1.6  | n.s.     |
| <i>Cd47</i>        | 6841410 | -1.4 | 3.60E-02 | -1.4  | n.s.     |
| <i>Acp2</i>        | 6879034 | -1.4 | 3.88E-02 | -1.4  | n.s.     |
| <i>Eng</i>         | 6876212 | -1.4 | 3.92E-02 | -1.3  | n.s.     |
| <i>Rnf31</i>       | 6819257 | -1.4 | 3.60E-02 | -1.3  | n.s.     |
| <i>Hpse</i>        | 6940363 | -1.4 | 4.53E-02 | n.d.  | n.d.     |
| <i>Ascc3</i>       | 6767760 | -1.3 | 4.53E-02 | -1.9  | n.s.     |
| <i>Dck</i>         | 6932234 | -1.3 | 3.88E-02 | -1.1  | n.s.     |
| <i>Sema4d</i>      | 6813187 | -1.3 | 4.48E-02 | -1.0  | n.s.     |
| <i>Rab20</i>       | 6980378 | -1.3 | 2.24E-02 | -1.7  | n.s.     |
| <i>Nub1</i>        | 6929312 | -1.3 | 3.88E-02 | -1.1  | n.s.     |
| <i>Tcirg1</i>      | 6870956 | -1.3 | 3.88E-02 | -1.1  | n.s.     |
| <i>Ttc39b</i>      | 6922895 | -1.3 | 3.60E-02 | 1.0   | n.s.     |
| <i>Mobkl2c</i>     | 6916510 | -1.3 | 4.65E-02 | -2.1  | n.s.     |
| <i>Fndc3a</i>      | 6825853 | -1.3 | 2.56E-02 | -1.2  | n.s.     |
| <i>Slc15a3</i>     | 6868058 | -1.3 | 3.93E-02 | -1.3  | n.s.     |
| <i>Bysl</i>        | 6855772 | 1.3  | 3.21E-02 | 1.5   | n.s.     |
| <i>Ccl2</i>        | 6782915 | 1.4  | n.s.     | 2.6   | 7.28E-05 |
| <i>Ccr1</i>        | 6999688 | 1.4  | n.s.     | 2.1   | 3.24E-03 |
| <i>Slc39a14</i>    | 6825688 | 1.5  | 2.50E-02 | 1.7   | n.s.     |
| <i>Pcdh7</i>       | 6931001 | 1.5  | 3.87E-02 | 2.0   | n.s.     |
| <i>Lpcat4</i>      | 6880033 | 1.8  | 3.49E-02 | n.d.  | n.d.     |
| <i>Gm14446</i>     | n.d.    | n.d. | n.d.     | -11.8 | 4.71E-06 |
| <i>Ifit3</i>       | n.d.    | n.d. | n.d.     | -11.8 | 2.89E-24 |
| <i>Gm12250</i>     | n.d.    | n.d. | n.d.     | -9.6  | 1.16E-04 |
| <i>H2-T24</i>      | n.d.    | n.d. | n.d.     | -5.5  | 6.68E-13 |
| <i>Usp18</i>       | n.d.    | n.d. | n.d.     | -5.3  | 7.58E-07 |
| <i>Gm4902</i>      | n.d.    | n.d. | n.d.     | -4.5  | 1.85E-09 |
| <i>Cd300lh</i>     | n.d.    | n.d. | n.d.     | -4.4  | 7.58E-03 |
| <i>Xaf1</i>        | n.d.    | n.d. | n.d.     | -3.7  | 3.75E-05 |
| <i>Oas1a</i>       | n.d.    | n.d. | n.d.     | -3.6  | 4.78E-04 |
| <i>Herc6</i>       | n.d.    | n.d. | n.d.     | -3.6  | 2.68E-05 |
| <i>H2-T23</i>      | n.d.    | n.d. | n.d.     | -3.2  | 2.18E-07 |
| <i>Lst1</i>        | n.d.    | n.d. | n.d.     | -2.8  | 2.29E-04 |
| <i>Al607873</i>    | n.d.    | n.d. | n.d.     | -2.8  | 2.59E-04 |
| <i>Tmem176a</i>    | n.d.    | n.d. | n.d.     | -2.7  | 2.06E-04 |
| <i>Ptpn7</i>       | n.d.    | n.d. | n.d.     | 1.8   | 7.00E-03 |
| <i>Serpib10-ps</i> | n.d.    | n.d. | n.d.     | 4.8   | 1.01E-04 |

TC ID = Transcript cluster Id, n.d. = not determined, n.s. = not significant
