# Supplementary material for: Gene-Expression Profiling Suggests Impaired Signaling via the Interferon Pathway in Cstb-/- Microglia
Source: PubMed Central journal article supplement (PMC4927094; doi:10.1371/journal.pone.0158195), 2016-06-29
Supplement: pone.0158195.s005.pdf [file pone.0158195.s005.pdf]

Supplementary table 2: Sequencing reads obtained by RNA-seq for control and *Cstb*<sup>-/-</sup> microglia samples.

| sample                       | repeat | qualified reads | total reads | redundancy | mapped reads | mapped rate | spike-in reads | mapped / spike-in |
|------------------------------|--------|-----------------|-------------|------------|--------------|-------------|----------------|-------------------|
| control 1                    | 1      | 2984694         | 679195      | 4.4        | 606601       | 0.89        | 564            | 1076              |
| control 1                    | 2      | 2317592         | 517534      | 4.5        | 457869       | 0.88        | 552            | 829               |
| control 1                    | 3      | 2527847         | 559275      | 4.5        | 491439       | 0.88        | 625            | 786               |
| control 1                    | 4      | 1714206         | 396263      | 4.3        | 353819       | 0.89        | 432            | 819               |
| control 2                    | 1      | 2500907         | 553827      | 4.5        | 492702       | 0.89        | 1299           | 379               |
| control 2                    | 2      | 2252758         | 506434      | 4.4        | 443755       | 0.88        | 1279           | 347               |
| control 2                    | 3      | 1899071         | 452731      | 4.2        | 396990       | 0.88        | 1034           | 384               |
| control 2                    | 4      | 1779932         | 397579      | 4.5        | 353190       | 0.89        | 834            | 423               |
| control 3                    | 1      | 2553812         | 566561      | 4.5        | 498987       | 0.88        | 1279           | 390               |
| control 3                    | 2      | 3107175         | 643850      | 4.8        | 563026       | 0.87        | 877            | 642               |
| control 3                    | 3      | 2781654         | 591424      | 4.7        | 518123       | 0.88        | 717            | 723               |
| control 3                    | 4      | 2205093         | 459893      | 4.8        | 406846       | 0.88        | 660            | 616               |
| control 4                    | 1      | 2431170         | 597674      | 4.1        | 526259       | 0.88        | 1726           | 305               |
| control 4                    | 2      | 2574585         | 565357      | 4.6        | 501508       | 0.89        | 1070           | 469               |
| control 4                    | 3      | 2656682         | 581931      | 4.6        | 516519       | 0.89        | 919            | 562               |
| control 4                    | 4      | 2467864         | 542767      | 4.5        | 484953       | 0.89        | 715            | 678               |
| <i>Cstb</i> <sup>-/-</sup> 1 | 1      | 2866067         | 605222      | 4.7        | 537135       | 0.89        | 1175           | 457               |
| <i>Cstb</i> <sup>-/-</sup> 1 | 2      | 2425846         | 523996      | 4.6        | 462365       | 0.88        | 1041           | 444               |
| <i>Cstb</i> <sup>-/-</sup> 1 | 3      | 1726517         | 373496      | 4.6        | 329673       | 0.88        | 647            | 510               |
| <i>Cstb</i> <sup>-/-</sup> 1 | 4      | 3084003         | 649858      | 4.7        | 575629       | 0.89        | 727            | 792               |
| <i>Cstb</i> <sup>-/-</sup> 2 | 1      | 3944327         | 794888      | 5.0        | 699396       | 0.88        | 1331           | 525               |
| <i>Cstb</i> <sup>-/-</sup> 2 | 2      | 1887789         | 432366      | 4.4        | 384937       | 0.89        | 895            | 430               |
| <i>Cstb</i> <sup>-/-</sup> 2 | 3      | 2257267         | 528927      | 4.3        | 468471       | 0.89        | 752            | 623               |
| <i>Cstb</i> <sup>-/-</sup> 2 | 4      | 1995105         | 469485      | 4.2        | 416751       | 0.89        | 673            | 619               |
| <i>Cstb</i> <sup>-/-</sup> 3 | 1      | 2352112         | 531547      | 4.4        | 472982       | 0.89        | 1099           | 430               |
| <i>Cstb</i> <sup>-/-</sup> 3 | 2      | 1959027         | 441155      | 4.4        | 392178       | 0.89        | 910            | 431               |
| <i>Cstb</i> <sup>-/-</sup> 3 | 3      | 2728797         | 588194      | 4.6        | 521859       | 0.89        | 943            | 553               |
| <i>Cstb</i> <sup>-/-</sup> 3 | 4      | 2810710         | 595598      | 4.7        | 527292       | 0.89        | 702            | 751               |
| <i>Cstb</i> <sup>-/-</sup> 4 | 1      | 1979259         | 454647      | 4.4        | 405341       | 0.89        | 493            | 822               |
| <i>Cstb</i> <sup>-/-</sup> 4 | 2      | 1763589         | 418578      | 4.2        | 372098       | 0.89        | 694            | 536               |
| <i>Cstb</i> <sup>-/-</sup> 4 | 3      | 2169921         | 504735      | 4.3        | 448723       | 0.89        | 574            | 782               |
| <i>Cstb</i> <sup>-/-</sup> 4 | 4      | 2258327         | 507985      | 4.4        | 449300       | 0.88        | 522            | 861               |

| sample                       | repeat | spike-in 5-end reads | spike-in 5-end rate | coding reads | coding 5-end reads | coding 5-end rate | force approval |
|------------------------------|--------|----------------------|---------------------|--------------|--------------------|-------------------|----------------|
| control 1                    | 1      | 538                  | 0.95                | 539076       | 431398             | 0.80              | FALSE          |
| control 1                    | 2      | 523                  | 0.95                | 401998       | 321253             | 0.80              | FALSE          |
| control 1                    | 3      | 602                  | 0.96                | 429162       | 346765             | 0.81              | FALSE          |
| control 1                    | 4      | 406                  | 0.94                | 314010       | 253953             | 0.81              | FALSE          |
| control 2                    | 1      | 1219                 | 0.94                | 436281       | 351597             | 0.81              | FALSE          |
| control 2                    | 2      | 1213                 | 0.95                | 382418       | 306825             | 0.80              | FALSE          |
| control 2                    | 3      | 982                  | 0.95                | 339670       | 273879             | 0.81              | FALSE          |
| control 2                    | 4      | 797                  | 0.96                | 310564       | 244472             | 0.79              | FALSE          |
| control 3                    | 1      | 1206                 | 0.94                | 432540       | 347957             | 0.80              | FALSE          |
| control 3                    | 2      | 828                  | 0.94                | 486974       | 391656             | 0.80              | FALSE          |
| control 3                    | 3      | 675                  | 0.94                | 444698       | 356105             | 0.80              | FALSE          |
| control 3                    | 4      | 620                  | 0.94                | 357503       | 290188             | 0.81              | FALSE          |
| control 4                    | 1      | 1653                 | 0.96                | 452748       | 361678             | 0.80              | FALSE          |
| control 4                    | 2      | 1030                 | 0.96                | 440975       | 357697             | 0.81              | FALSE          |
| control 4                    | 3      | 872                  | 0.95                | 452378       | 364774             | 0.81              | FALSE          |
| control 4                    | 4      | 670                  | 0.94                | 429548       | 347108             | 0.81              | FALSE          |
| <i>Cstb</i> <sup>-/-</sup> 1 | 1      | 1129                 | 0.96                | 478488       | 394049             | 0.82              | FALSE          |
| <i>Cstb</i> <sup>-/-</sup> 1 | 2      | 986                  | 0.95                | 408077       | 336150             | 0.82              | FALSE          |
| <i>Cstb</i> <sup>-/-</sup> 1 | 3      | 616                  | 0.95                | 291861       | 240904             | 0.83              | FALSE          |
| <i>Cstb</i> <sup>-/-</sup> 1 | 4      | 684                  | 0.94                | 513870       | 423753             | 0.82              | FALSE          |
| <i>Cstb</i> <sup>-/-</sup> 2 | 1      | 1248                 | 0.94                | 599752       | 475204             | 0.79              | FALSE          |
| <i>Cstb</i> <sup>-/-</sup> 2 | 2      | 851                  | 0.95                | 334837       | 267840             | 0.80              | FALSE          |
| <i>Cstb</i> <sup>-/-</sup> 2 | 3      | 721                  | 0.96                | 407345       | 328726             | 0.81              | FALSE          |
| <i>Cstb</i> <sup>-/-</sup> 2 | 4      | 636                  | 0.95                | 361631       | 290309             | 0.80              | FALSE          |
| <i>Cstb</i> <sup>-/-</sup> 3 | 1      | 1036                 | 0.94                | 424043       | 348208             | 0.82              | FALSE          |
| <i>Cstb</i> <sup>-/-</sup> 3 | 2      | 850                  | 0.93                | 351672       | 290626             | 0.83              | FALSE          |
| <i>Cstb</i> <sup>-/-</sup> 3 | 3      | 890                  | 0.94                | 468891       | 389908             | 0.83              | FALSE          |
| <i>Cstb</i> <sup>-/-</sup> 3 | 4      | 658                  | 0.94                | 471729       | 387096             | 0.82              | FALSE          |
| <i>Cstb</i> <sup>-/-</sup> 4 | 1      | 465                  | 0.94                | 356305       | 285920             | 0.80              | FALSE          |
| <i>Cstb</i> <sup>-/-</sup> 4 | 2      | 648                  | 0.93                | 326924       | 265279             | 0.81              | FALSE          |
| <i>Cstb</i> <sup>-/-</sup> 4 | 3      | 544                  | 0.95                | 395855       | 320891             | 0.81              | FALSE          |
| <i>Cstb</i> <sup>-/-</sup> 4 | 4      | 483                  | 0.93                | 392434       | 311760             | 0.79              | FALSE          |

| sample                       | repeat | spike-in reads outlier | mapped / spike-in outlier | spike-in 5-end rate outlier | coding 5-end rate outlier |
|------------------------------|--------|------------------------|---------------------------|-----------------------------|---------------------------|
| control 1                    | 1      | FALSE                  | FALSE                     | FALSE                       | FALSE                     |
| control 1                    | 2      | FALSE                  | FALSE                     | FALSE                       | FALSE                     |
| control 1                    | 3      | FALSE                  | FALSE                     | FALSE                       | FALSE                     |
| control 1                    | 4      | FALSE                  | FALSE                     | FALSE                       | FALSE                     |
| control 2                    | 1      | FALSE                  | FALSE                     | FALSE                       | FALSE                     |
| control 2                    | 2      | FALSE                  | FALSE                     | FALSE                       | FALSE                     |
| control 2                    | 3      | FALSE                  | FALSE                     | FALSE                       | FALSE                     |
| control 2                    | 4      | FALSE                  | FALSE                     | FALSE                       | FALSE                     |
| control 3                    | 1      | FALSE                  | FALSE                     | FALSE                       | FALSE                     |
| control 3                    | 2      | FALSE                  | FALSE                     | FALSE                       | FALSE                     |
| control 3                    | 3      | FALSE                  | FALSE                     | FALSE                       | FALSE                     |
| control 3                    | 4      | FALSE                  | FALSE                     | FALSE                       | FALSE                     |
| control 4                    | 1      | FALSE                  | FALSE                     | FALSE                       | FALSE                     |
| control 4                    | 2      | FALSE                  | FALSE                     | FALSE                       | FALSE                     |
| control 4                    | 3      | FALSE                  | FALSE                     | FALSE                       | FALSE                     |
| control 4                    | 4      | FALSE                  | FALSE                     | FALSE                       | FALSE                     |
| <i>Cstb</i> <sup>-/-</sup> 1 | 1      | FALSE                  | FALSE                     | FALSE                       | FALSE                     |
| <i>Cstb</i> <sup>-/-</sup> 1 | 2      | FALSE                  | FALSE                     | FALSE                       | FALSE                     |
| <i>Cstb</i> <sup>-/-</sup> 1 | 3      | FALSE                  | FALSE                     | FALSE                       | FALSE                     |
| <i>Cstb</i> <sup>-/-</sup> 1 | 4      | FALSE                  | FALSE                     | FALSE                       | FALSE                     |
| <i>Cstb</i> <sup>-/-</sup> 2 | 1      | FALSE                  | FALSE                     | FALSE                       | FALSE                     |
| <i>Cstb</i> <sup>-/-</sup> 2 | 2      | FALSE                  | FALSE                     | FALSE                       | FALSE                     |
| <i>Cstb</i> <sup>-/-</sup> 2 | 3      | FALSE                  | FALSE                     | FALSE                       | FALSE                     |
| <i>Cstb</i> <sup>-/-</sup> 2 | 4      | FALSE                  | FALSE                     | FALSE                       | FALSE                     |
| <i>Cstb</i> <sup>-/-</sup> 3 | 1      | FALSE                  | FALSE                     | FALSE                       | FALSE                     |
| <i>Cstb</i> <sup>-/-</sup> 3 | 2      | FALSE                  | FALSE                     | FALSE                       | FALSE                     |
| <i>Cstb</i> <sup>-/-</sup> 3 | 3      | FALSE                  | FALSE                     | FALSE                       | FALSE                     |
| <i>Cstb</i> <sup>-/-</sup> 3 | 4      | FALSE                  | FALSE                     | FALSE                       | FALSE                     |
| <i>Cstb</i> <sup>-/-</sup> 4 | 1      | FALSE                  | FALSE                     | FALSE                       | FALSE                     |
| <i>Cstb</i> <sup>-/-</sup> 4 | 2      | FALSE                  | FALSE                     | FALSE                       | FALSE                     |
| <i>Cstb</i> <sup>-/-</sup> 4 | 3      | FALSE                  | FALSE                     | FALSE                       | FALSE                     |
| <i>Cstb</i> <sup>-/-</sup> 4 | 4      | FALSE                  | FALSE                     | FALSE                       | FALSE                     |
