# Supplementary material for: Gene-Expression Profiling Suggests Impaired Signaling via the Interferon Pathway in Cstb-/- Microglia
Source: PubMed Central journal article supplement (PMC4927094; doi:10.1371/journal.pone.0158195), 2016-06-29
Supplement: pone.0158195.s006.pdf [file pone.0158195.s006.pdf]

**Supplementary table 3: Expected number of overlapping DEGs.**

|                                        | <b>Microarray DEG</b> | <b>Microarray non-DEG or not detected</b> | <b>Total</b> |
|----------------------------------------|-----------------------|-------------------------------------------|--------------|
| <b>RNA-seq DEG</b>                     | 33 (1)                | 122 (154)                                 | 155          |
| <b>RNA-seq non-DEG or not detected</b> | 29 (61)               | 14236 (14204)                             | 14265        |
|                                        | 62                    | 14358                                     | 14420        |
