# Supplementary material for: Gene-Expression Profiling Suggests Impaired Signaling via the Interferon Pathway in Cstb-/- Microglia
Source: PubMed Central journal article supplement (PMC4927094; doi:10.1371/journal.pone.0158195), 2016-06-29
Supplement: pone.0158195.s007.pdf [file pone.0158195.s007.pdf]

**Supplementary table 4: Gene ontology terms enriched in differentially expressed genes in *Cstb*<sup>-/-</sup> microglia identified by microarray.**

N = total number of genes, B = Genes associated with GO term, n = Genes in the target set, b = Genes in target set associated with GO term

**Biological processes**

| GO Term    | Description                                                        | p-value  | FDR q-value | Enrichment | N     | B    | n   | b  |
|------------|--------------------------------------------------------------------|----------|-------------|------------|-------|------|-----|----|
| GO:0009615 | response to virus                                                  | 3.49E-27 | 4.66E-23    | 20.84      | 18026 | 147  | 153 | 26 |
| GO:0043207 | response to external biotic stimulus                               | 1.05E-24 | 7.01E-21    | 8.43       | 18026 | 531  | 153 | 38 |
| GO:0051707 | response to other organism                                         | 3.32E-24 | 1.48E-20    | 10.31      | 18026 | 377  | 153 | 33 |
| GO:0009607 | response to biotic stimulus                                        | 4.80E-24 | 1.60E-20    | 8.08       | 18026 | 554  | 153 | 38 |
| GO:0051607 | defense response to virus                                          | 9.90E-24 | 2.65E-20    | 22.15      | 18026 | 117  | 153 | 22 |
| GO:0006952 | defense response                                                   | 2.87E-21 | 6.40E-18    | 6.28       | 18026 | 751  | 153 | 40 |
| GO:0002252 | immune effector process                                            | 4.52E-21 | 8.64E-18    | 10.75      | 18026 | 307  | 153 | 28 |
| GO:0051704 | multi-organism process                                             | 1.93E-20 | 3.23E-17    | 6.89       | 18026 | 616  | 153 | 36 |
| GO:0098542 | defense response to other organism                                 | 1.05E-19 | 1.56E-16    | 10.16      | 18026 | 313  | 153 | 27 |
| GO:0045087 | innate immune response                                             | 4.75E-19 | 6.35E-16    | 10.21      | 18026 | 300  | 153 | 26 |
| GO:0002376 | immune system process                                              | 5.92E-19 | 7.20E-16    | 4.81       | 18026 | 1077 | 153 | 44 |
| GO:0009605 | response to external stimulus                                      | 1.44E-17 | 1.60E-14    | 5.09       | 18026 | 903  | 153 | 39 |
| GO:0006955 | immune response                                                    | 4.52E-17 | 4.65E-14    | 6.58       | 18026 | 555  | 153 | 31 |
| GO:0048525 | negative regulation of viral process                               | 5.04E-17 | 4.82E-14    | 23.88      | 18026 | 74   | 153 | 15 |
| GO:0043901 | negative regulation of multi-organism process                      | 5.67E-17 | 5.05E-14    | 16.07      | 18026 | 132  | 153 | 18 |
| GO:0035456 | response to interferon-beta                                        | 3.47E-16 | 2.90E-13    | 44.69      | 18026 | 29   | 153 | 11 |
| GO:0050792 | regulation of viral process                                        | 5.21E-16 | 4.10E-13    | 15.9       | 18026 | 126  | 153 | 17 |
| GO:0035458 | cellular response to interferon-beta                               | 4.22E-15 | 3.14E-12    | 47.13      | 18026 | 25   | 153 | 10 |
| GO:0043903 | regulation of symbiosis, encompassing mutualism through parasitism | 1.78E-14 | 1.26E-11    | 12.92      | 18026 | 155  | 153 | 17 |
| GO:1903901 | negative regulation of viral life cycle                            | 2.22E-14 | 1.48E-11    | 21.88      | 18026 | 70   | 153 | 13 |
| GO:1903900 | regulation of viral life cycle                                     | 8.27E-14 | 5.27E-11    | 14.85      | 18026 | 119  | 153 | 15 |
| GO:0045071 | negative regulation of viral genome replication                    | 1.59E-13 | 9.65E-11    | 34.65      | 18026 | 34   | 153 | 10 |
| GO:0043900 | regulation of multi-organism process                               | 2.37E-13 | 1.38E-10    | 7.41       | 18026 | 350  | 153 | 22 |
| GO:0034097 | response to cytokine                                               | 3.46E-13 | 1.93E-10    | 9.03       | 18026 | 248  | 153 | 19 |
| GO:0031347 | regulation of defense response                                     | 1.05E-12 | 5.60E-10    | 6.13       | 18026 | 461  | 153 | 24 |
| GO:0006950 | response to stress                                                 | 1.14E-12 | 5.87E-10    | 2.9        | 18026 | 2030 | 153 | 50 |
| GO:0045088 | regulation of innate immune response                               | 1.74E-11 | 8.62E-09    | 11.62      | 18026 | 142  | 153 | 14 |
| GO:0045069 | regulation of viral genome replication                             | 3.68E-11 | 1.76E-08    | 21.04      | 18026 | 56   | 153 | 10 |

|            |                                                            |          |          |       |       |      |     |    |
|------------|------------------------------------------------------------|----------|----------|-------|-------|------|-----|----|
| GO:0002682 | regulation of immune system process                        | 2.50E-10 | 1.15E-07 | 3.66  | 18026 | 997  | 153 | 31 |
| GO:0071345 | cellular response to cytokine stimulus                     | 2.63E-10 | 1.17E-07 | 10.71 | 18026 | 143  | 153 | 13 |
| GO:0050776 | regulation of immune response                              | 3.65E-09 | 1.58E-06 | 5.27  | 18026 | 425  | 153 | 19 |
| GO:0001817 | regulation of cytokine production                          | 8.00E-09 | 3.35E-06 | 5.02  | 18026 | 446  | 153 | 19 |
| GO:0045824 | negative regulation of innate immune response              | 9.82E-09 | 3.98E-06 | 24.99 | 18026 | 33   | 153 | 7  |
| GO:0002684 | positive regulation of immune system process               | 3.49E-08 | 1.37E-05 | 4.14  | 18026 | 597  | 153 | 21 |
| GO:0080134 | regulation of response to stress                           | 4.15E-08 | 1.59E-05 | 3.19  | 18026 | 1033 | 153 | 28 |
| GO:0031349 | positive regulation of defense response                    | 9.01E-08 | 3.35E-05 | 7.36  | 18026 | 192  | 153 | 12 |
| GO:0035455 | response to interferon-alpha                               | 1.67E-07 | 6.04E-05 | 36.82 | 18026 | 16   | 153 | 5  |
| GO:0001819 | positive regulation of cytokine production                 | 2.18E-07 | 7.66E-05 | 5.61  | 18026 | 294  | 153 | 14 |
| GO:0050896 | response to stimulus                                       | 4.92E-07 | 1.69E-04 | 1.74  | 18026 | 4470 | 153 | 66 |
|            | antigen processing and presentation of peptide antigen via |          |          |       |       |      |     |    |
| GO:0002474 | MHC class I                                                | 7.48E-07 | 2.50E-04 | 18.6  | 18026 | 38   | 153 | 6  |
| GO:0010033 | response to organic substance                              | 7.88E-07 | 2.57E-04 | 2.58  | 18026 | 1413 | 153 | 31 |
| GO:0032496 | response to lipopolysaccharide                             | 7.93E-07 | 2.52E-04 | 6.71  | 18026 | 193  | 153 | 11 |
| GO:0031348 | negative regulation of defense response                    | 1.28E-06 | 3.97E-04 | 8.42  | 18026 | 126  | 153 | 9  |
| GO:0002697 | regulation of immune effector process                      | 1.43E-06 | 4.35E-04 | 4.79  | 18026 | 344  | 153 | 14 |
| GO:0002237 | response to molecule of bacterial origin                   | 1.58E-06 | 4.69E-04 | 6.26  | 18026 | 207  | 153 | 11 |
| GO:0071310 | cellular response to organic substance                     | 2.97E-06 | 8.62E-04 | 3.16  | 18026 | 783  | 153 | 21 |
| GO:0071222 | cellular response to lipopolysaccharide                    | 3.12E-06 | 8.87E-04 | 8.98  | 18026 | 105  | 153 | 8  |
| GO:0050777 | negative regulation of immune response                     | 3.35E-06 | 9.33E-04 | 8.89  | 18026 | 106  | 153 | 8  |
| GO:0032481 | positive regulation of type I interferon production        | 3.46E-06 | 9.45E-04 | 21.04 | 18026 | 28   | 153 | 5  |
| GO:0032020 | ISG15-protein conjugation                                  | 5.92E-06 | 1.58E-03 | 70.69 | 18026 | 5    | 153 | 3  |
| GO:0071219 | cellular response to molecule of bacterial origin          | 6.16E-06 | 1.61E-03 | 8.2   | 18026 | 115  | 153 | 8  |
| GO:0048002 | antigen processing and presentation of peptide antigen     | 6.25E-06 | 1.61E-03 | 13.09 | 18026 | 54   | 153 | 6  |
| GO:0019882 | antigen processing and presentation                        | 7.84E-06 | 1.98E-03 | 9.7   | 18026 | 85   | 153 | 7  |
| GO:0051716 | cellular response to stimulus                              | 1.60E-05 | 3.95E-03 | 2.16  | 18026 | 1800 | 153 | 33 |
| GO:0071216 | cellular response to biotic stimulus                       | 1.70E-05 | 4.13E-03 | 7.14  | 18026 | 132  | 153 | 8  |
| GO:0032479 | regulation of type I interferon production                 | 1.88E-05 | 4.49E-03 | 15.1  | 18026 | 39   | 153 | 5  |
| GO:0034121 | regulation of toll-like receptor signaling pathway         | 1.88E-05 | 4.42E-03 | 15.1  | 18026 | 39   | 153 | 5  |
| GO:0002683 | negative regulation of immune system process               | 2.71E-05 | 6.24E-03 | 4.26  | 18026 | 332  | 153 | 12 |
| GO:0042221 | response to chemical                                       | 2.92E-05 | 6.62E-03 | 2.13  | 18026 | 1770 | 153 | 32 |
| GO:0070887 | cellular response to chemical stimulus                     | 3.06E-05 | 6.82E-03 | 2.63  | 18026 | 986  | 153 | 22 |
| GO:0032652 | regulation of interleukin-1 production                     | 3.06E-05 | 6.71E-03 | 13.7  | 18026 | 43   | 153 | 5  |

|            |                                                                    |          |          |       |       |      |     |    |
|------------|--------------------------------------------------------------------|----------|----------|-------|-------|------|-----|----|
| GO:0022610 | biological adhesion                                                | 3.47E-05 | 7.49E-03 | 2.87  | 18026 | 780  | 153 | 19 |
| GO:0032728 | positive regulation of interferon-beta production                  | 4.65E-05 | 9.86E-03 | 19.64 | 18026 | 24   | 153 | 4  |
| GO:0050778 | positive regulation of immune response                             | 6.21E-05 | 1.30E-02 | 4.24  | 18026 | 306  | 153 | 11 |
| GO:0098586 | cellular response to virus                                         | 6.89E-05 | 1.42E-02 | 35.35 | 18026 | 10   | 153 | 3  |
| GO:0002675 | positive regulation of acute inflammatory response                 | 8.72E-05 | 1.77E-02 | 16.83 | 18026 | 28   | 153 | 4  |
| GO:0060338 | regulation of type I interferon-mediated signaling pathway         | 9.41E-05 | 1.88E-02 | 32.13 | 18026 | 11   | 153 | 3  |
| GO:0050729 | positive regulation of inflammatory response                       | 9.72E-05 | 1.91E-02 | 8.13  | 18026 | 87   | 153 | 6  |
| GO:1903036 | positive regulation of response to wounding                        | 1.16E-04 | 2.26E-02 | 6.39  | 18026 | 129  | 153 | 7  |
| GO:0032101 | regulation of response to external stimulus                        | 1.17E-04 | 2.24E-02 | 2.81  | 18026 | 712  | 153 | 17 |
| GO:0050727 | regulation of inflammatory response                                | 1.32E-04 | 2.48E-02 | 4.71  | 18026 | 225  | 153 | 9  |
| GO:0002698 | negative regulation of immune effector process                     | 1.33E-04 | 2.46E-02 | 7.68  | 18026 | 92   | 153 | 6  |
| GO:0044764 | multi-organism cellular process                                    | 1.33E-04 | 2.43E-02 | 7.68  | 18026 | 92   | 153 | 6  |
| GO:0048583 | regulation of response to stimulus                                 | 1.57E-04 | 2.84E-02 | 1.76  | 18026 | 2750 | 153 | 41 |
| GO:0051092 | positive regulation of NF-kappaB transcription factor activity     | 1.58E-04 | 2.82E-02 | 7.44  | 18026 | 95   | 153 | 6  |
| GO:0032648 | regulation of interferon-beta production                           | 1.69E-04 | 2.97E-02 | 14.28 | 18026 | 33   | 153 | 4  |
| GO:0002716 | negative regulation of natural killer cell mediated immunity       | 2.04E-04 | 3.54E-02 | 25.25 | 18026 | 14   | 153 | 3  |
| GO:0045953 | negative regulation of natural killer cell mediated cytotoxicity   | 2.04E-04 | 3.49E-02 | 25.25 | 18026 | 14   | 153 | 3  |
| GO:0032727 | positive regulation of interferon-alpha production                 | 2.04E-04 | 3.45E-02 | 25.25 | 18026 | 14   | 153 | 3  |
| GO:0042089 | cytokine biosynthetic process                                      | 2.04E-04 | 3.41E-02 | 25.25 | 18026 | 14   | 153 | 3  |
| GO:0034340 | response to type I interferon                                      | 2.14E-04 | 3.53E-02 | 78.54 | 18026 | 3    | 153 | 2  |
| GO:0034124 | regulation of MyD88-dependent toll-like receptor signaling pathway | 2.14E-04 | 3.48E-02 | 78.54 | 18026 | 3    | 153 | 2  |
| GO:0060333 | interferon-gamma-mediated signaling pathway                        | 2.14E-04 | 3.44E-02 | 78.54 | 18026 | 3    | 153 | 2  |
| GO:0032651 | regulation of interleukin-1 beta production                        | 2.38E-04 | 3.79E-02 | 13.09 | 18026 | 36   | 153 | 4  |
| GO:0002703 | regulation of leukocyte mediated immunity                          | 2.84E-04 | 4.46E-02 | 5.54  | 18026 | 149  | 153 | 7  |
| GO:0007155 | cell adhesion                                                      | 3.05E-04 | 4.74E-02 | 2.59  | 18026 | 772  | 153 | 17 |
| GO:0032647 | regulation of interferon-alpha production                          | 3.10E-04 | 4.76E-02 | 22.09 | 18026 | 16   | 153 | 3  |
| GO:0032692 | negative regulation of interleukin-1 production                    | 3.10E-04 | 4.70E-02 | 22.09 | 18026 | 16   | 153 | 3  |
| GO:0060759 | regulation of response to cytokine stimulus                        | 3.20E-04 | 4.81E-02 | 8.42  | 18026 | 70   | 153 | 5  |
| GO:0002706 | regulation of lymphocyte mediated immunity                         | 3.34E-04 | 4.97E-02 | 6.49  | 18026 | 109  | 153 | 6  |
| GO:0034341 | response to interferon-gamma                                       | 3.96E-04 | 5.82E-02 | 11.49 | 18026 | 41   | 153 | 4  |
| GO:1901342 | regulation of vasculature development                              | 4.20E-04 | 6.11E-02 | 4.51  | 18026 | 209  | 153 | 8  |
| GO:0032367 | intracellular cholesterol transport                                | 4.25E-04 | 6.11E-02 | 58.91 | 18026 | 4    | 153 | 2  |
| GO:1900225 | regulation of NLRP3 inflammasome complex assembly                  | 4.25E-04 | 6.04E-02 | 58.91 | 18026 | 4    | 153 | 2  |

|            |                                                               |          |          |       |       |      |     |    |
|------------|---------------------------------------------------------------|----------|----------|-------|-------|------|-----|----|
|            | cytoplasmic pattern recognition receptor signaling pathway    |          |          |       |       |      |     |    |
| GO:0039528 | in response to virus                                          | 4.25E-04 | 5.98E-02 | 58.91 | 18026 | 4    | 153 | 2  |
| GO:0001911 | negative regulation of leukocyte mediated cytotoxicity        | 4.46E-04 | 6.21E-02 | 19.64 | 18026 | 18   | 153 | 3  |
| GO:0042107 | cytokine metabolic process                                    | 4.46E-04 | 6.14E-02 | 19.64 | 18026 | 18   | 153 | 3  |
| GO:0009617 | response to bacterium                                         | 4.76E-04 | 6.50E-02 | 4.43  | 18026 | 213  | 153 | 8  |
| GO:0033993 | response to lipid                                             | 5.05E-04 | 6.82E-02 | 3.11  | 18026 | 454  | 153 | 12 |
| GO:0002819 | regulation of adaptive immune response                        | 5.35E-04 | 7.15E-02 | 5.94  | 18026 | 119  | 153 | 6  |
| GO:1903034 | regulation of response to wounding                            | 5.64E-04 | 7.47E-02 | 3.54  | 18026 | 333  | 153 | 10 |
| GO:0002831 | regulation of response to biotic stimulus                     | 5.84E-04 | 7.66E-02 | 4.91  | 18026 | 168  | 153 | 7  |
| GO:0048584 | positive regulation of response to stimulus                   | 5.92E-04 | 7.69E-02 | 1.98  | 18026 | 1550 | 153 | 26 |
| GO:0050704 | regulation of interleukin-1 secretion                         | 6.15E-04 | 7.90E-02 | 17.67 | 18026 | 20   | 153 | 3  |
| GO:0031342 | negative regulation of cell killing                           | 6.15E-04 | 7.83E-02 | 17.67 | 18026 | 20   | 153 | 3  |
| GO:0043122 | regulation of I-kappaB kinase/NF-kappaB signaling             | 6.27E-04 | 7.91E-02 | 4.85  | 18026 | 170  | 153 | 7  |
| GO:0032366 | intracellular sterol transport                                | 7.04E-04 | 8.80E-02 | 47.13 | 18026 | 5    | 153 | 2  |
|            | negative regulation of syncytium formation by plasma membrane |          |          |       |       |      |     |    |
| GO:0034242 | fusion                                                        | 7.04E-04 | 8.72E-02 | 47.13 | 18026 | 5    | 153 | 2  |
| GO:0045351 | type I interferon biosynthetic process                        | 7.04E-04 | 8.64E-02 | 47.13 | 18026 | 5    | 153 | 2  |
| GO:0050711 | negative regulation of interleukin-1 secretion                | 7.04E-04 | 8.56E-02 | 47.13 | 18026 | 5    | 153 | 2  |
|            | positive regulation of vascular endothelial growth factor     |          |          |       |       |      |     |    |
| GO:0010575 | production                                                    | 8.20E-04 | 9.88E-02 | 16.07 | 18026 | 22   | 153 | 3  |
| GO:0002832 | negative regulation of response to biotic stimulus            | 8.20E-04 | 9.79E-02 | 16.07 | 18026 | 22   | 153 | 3  |
| GO:0071396 | cellular response to lipid                                    | 9.31E-04 | 1.10E-01 | 3.99  | 18026 | 236  | 153 | 8  |
| GO:0002673 | regulation of acute inflammatory response                     | 9.84E-04 | 1.15E-01 | 9.06  | 18026 | 52   | 153 | 4  |

### Molecular functions

| GO Term    | Description                                        | p-value  | FDR q-value | Enrichment | N     | B   | n   | b  |
|------------|----------------------------------------------------|----------|-------------|------------|-------|-----|-----|----|
| GO:0003725 | double-stranded RNA binding                        | 1.25E-10 | 5.85E-07    | 18.7       | 18026 | 63  | 153 | 10 |
| GO:0001730 | 2'-5'-oligoadenylate synthetase activity           | 5.92E-06 | 1.38E-02    | 70.69      | 18026 | 5   | 153 | 3  |
| GO:0003950 | NAD+ ADP-ribosyltransferase activity               | 1.09E-05 | 1.69E-02    | 27.72      | 18026 | 17  | 153 | 4  |
| GO:0016763 | transferase activity, transferring pentosyl groups | 3.06E-05 | 3.57E-02    | 13.7       | 18026 | 43  | 153 | 5  |
| GO:0017111 | nucleoside-triphosphatase activity                 | 3.49E-05 | 3.26E-02    | 3.11       | 18026 | 645 | 153 | 17 |
| GO:0008270 | zinc ion binding                                   | 6.69E-05 | 5.20E-02    | 2.64       | 18026 | 891 | 153 | 20 |
| GO:0016462 | pyrophosphatase activity                           | 6.84E-05 | 4.56E-02    | 2.94       | 18026 | 681 | 153 | 17 |

|            |                                                                                    |          |          |        |       |      |     |    |
|------------|------------------------------------------------------------------------------------|----------|----------|--------|-------|------|-----|----|
| GO:0016818 | hydrolase activity, acting on acid anhydrides, in phosphorus-containing anhydrides | 7.09E-05 | 4.14E-02 | 2.93   | 18026 | 683  | 153 | 17 |
| GO:0003692 | left-handed Z-DNA binding                                                          | 7.16E-05 | 3.71E-02 | 117.82 | 18026 | 2    | 153 | 2  |
| GO:0016817 | hydrolase activity, acting on acid anhydrides                                      | 7.22E-05 | 3.37E-02 | 2.93   | 18026 | 684  | 153 | 17 |
| GO:0046977 | TAP binding                                                                        | 9.41E-05 | 3.99E-02 | 32.13  | 18026 | 11   | 153 | 3  |
| GO:0097367 | carbohydrate derivative binding                                                    | 9.94E-05 | 3.86E-02 | 2      | 18026 | 1886 | 153 | 32 |
| GO:0017076 | purine nucleotide binding                                                          | 1.12E-04 | 4.03E-02 | 2.12   | 18026 | 1558 | 153 | 28 |
| GO:0035639 | purine ribonucleoside triphosphate binding                                         | 1.70E-04 | 5.68E-02 | 2.1    | 18026 | 1513 | 153 | 27 |
| GO:0032550 | purine ribonucleoside binding                                                      | 1.88E-04 | 5.84E-02 | 2.09   | 18026 | 1522 | 153 | 27 |
| GO:0032549 | ribonucleoside binding                                                             | 1.94E-04 | 5.65E-02 | 2.09   | 18026 | 1525 | 153 | 27 |
| GO:0001883 | purine nucleoside binding                                                          | 1.94E-04 | 5.32E-02 | 2.09   | 18026 | 1525 | 153 | 27 |
| GO:0003723 | RNA binding                                                                        | 1.97E-04 | 5.12E-02 | 2.16   | 18026 | 1361 | 153 | 25 |
| GO:0003726 | double-stranded RNA adenosine deaminase activity                                   | 2.14E-04 | 5.24E-02 | 78.54  | 18026 | 3    | 153 | 2  |
| GO:0046978 | TAP1 binding                                                                       | 2.14E-04 | 4.98E-02 | 78.54  | 18026 | 3    | 153 | 2  |
| GO:0046979 | TAP2 binding                                                                       | 2.14E-04 | 4.74E-02 | 78.54  | 18026 | 3    | 153 | 2  |
| GO:0001882 | nucleoside binding                                                                 | 2.15E-04 | 4.57E-02 | 2.07   | 18026 | 1535 | 153 | 27 |
| GO:0042605 | peptide antigen binding                                                            | 2.38E-04 | 4.83E-02 | 13.09  | 18026 | 36   | 153 | 4  |
| GO:0032555 | purine ribonucleotide binding                                                      | 2.49E-04 | 4.85E-02 | 2.05   | 18026 | 1549 | 153 | 27 |
| GO:0032553 | ribonucleotide binding                                                             | 2.88E-04 | 5.37E-02 | 2.04   | 18026 | 1563 | 153 | 27 |
| GO:0015248 | sterol transporter activity                                                        | 3.10E-04 | 5.55E-02 | 22.09  | 18026 | 16   | 153 | 3  |
| GO:0017127 | cholesterol transporter activity                                                   | 3.10E-04 | 5.35E-02 | 22.09  | 18026 | 16   | 153 | 3  |
| GO:0048020 | CCR chemokine receptor binding                                                     | 3.74E-04 | 6.22E-02 | 20.79  | 18026 | 17   | 153 | 3  |
| GO:0030554 | adenyl nucleotide binding                                                          | 4.23E-04 | 6.80E-02 | 2.14   | 18026 | 1265 | 153 | 23 |
| GO:0046914 | transition metal ion binding                                                       | 4.81E-04 | 7.48E-02 | 2.22   | 18026 | 1114 | 153 | 21 |
| GO:0003690 | double-stranded DNA binding                                                        | 5.35E-04 | 8.05E-02 | 5.94   | 18026 | 119  | 153 | 6  |
| GO:0005524 | ATP binding                                                                        | 7.10E-04 | 1.03E-01 | 2.11   | 18026 | 1230 | 153 | 22 |
| GO:0042379 | chemokine receptor binding                                                         | 7.26E-04 | 1.03E-01 | 9.82   | 18026 | 48   | 153 | 4  |
| GO:0032559 | adenyl ribonucleotide binding                                                      | 9.54E-04 | 1.31E-01 | 2.06   | 18026 | 1258 | 153 | 22 |

#### Cellular component

| GO Term    | Description      | p-value  | FDR q-value | Enrichment | N     | B   | n   | b  |
|------------|------------------|----------|-------------|------------|-------|-----|-----|----|
| GO:0098552 | side of membrane | 2.61E-04 | 4.10E-01    | 3.9        | 18026 | 302 | 153 | 10 |
| GO:0042825 | TAP complex      | 4.25E-04 | 3.33E-01    | 58.91      | 18026 | 4   | 153 | 2  |

|                                |          |          |       |       |      |     |    |
|--------------------------------|----------|----------|-------|-------|------|-----|----|
| GO:0005737 cytoplasm           | 7.45E-04 | 3.89E-01 | 1.4   | 18026 | 5643 | 153 | 67 |
| GO:0044217 other organism part | 8.20E-04 | 3.21E-01 | 16.07 | 18026 | 22   | 153 | 3  |
