# Supplementary material for: Gene-Expression Profiling Suggests Impaired Signaling via the Interferon Pathway in Cstb-/- Microglia
Source: PubMed Central journal article supplement (PMC4927094; doi:10.1371/journal.pone.0158195), 2016-06-29
Supplement: pone.0158195.s008.pdf [file pone.0158195.s008.pdf]

**Supplementary table 5: Gene ontology terms enriched in differentially expressed genes in *Cstb*<sup>-/-</sup> microglia identified by RNA-seq.**

N = total number of genes, B = Genes associated with GO term, n = Genes at the top of the list, b = Genes at the top associated with GO term

**Biological processes**

| GO Term    | Description                                             | p-value  | FDR q-value | Enrichment | N     | B    | n    | b   |
|------------|---------------------------------------------------------|----------|-------------|------------|-------|------|------|-----|
| GO:0006952 | defense response                                        | 3.44E-19 | 4.29E-15    | 2.48       | 12540 | 500  | 1212 | 120 |
| GO:2000026 | regulation of multicellular organismal development      | 1.34E-15 | 8.37E-12    | 1.97       | 12540 | 1148 | 928  | 167 |
| GO:0009607 | response to biotic stimulus                             | 1.25E-14 | 5.20E-11    | 2.68       | 12540 | 386  | 1006 | 83  |
| GO:0043207 | response to external biotic stimulus                    | 1.67E-14 | 5.20E-11    | 3.03       | 12540 | 368  | 776  | 69  |
| GO:0051239 | regulation of multicellular organismal process          | 1.67E-14 | 4.18E-11    | 1.67       | 12540 | 1674 | 1087 | 243 |
| GO:0051707 | response to other organism                              | 2.68E-14 | 5.56E-11    | 3.01       | 12540 | 253  | 1006 | 61  |
| GO:0009615 | response to virus                                       | 4.34E-14 | 7.73E-11    | 12.97      | 12540 | 120  | 145  | 18  |
| GO:0051240 | positive regulation of multicellular organismal process | 9.00E-14 | 1.40E-10    | 1.85       | 12540 | 987  | 1087 | 158 |
| GO:0009605 | response to external stimulus                           | 1.12E-13 | 1.56E-10    | 2.03       | 12540 | 627  | 1214 | 123 |
| GO:0050793 | regulation of developmental process                     | 1.63E-13 | 2.04E-10    | 1.95       | 12540 | 1538 | 557  | 133 |
| GO:0006955 | immune response                                         | 1.64E-13 | 1.86E-10    | 2.51       | 12540 | 388  | 1107 | 86  |
| GO:0002376 | immune system process                                   | 1.65E-13 | 1.71E-10    | 1.95       | 12540 | 811  | 1180 | 149 |
| GO:0051704 | multi-organism process                                  | 2.22E-13 | 2.13E-10    | 2.38       | 12540 | 440  | 1032 | 86  |
| GO:0051607 | defense response to virus                               | 5.11E-13 | 4.55E-10    | 31.9       | 12540 | 94   | 46   | 11  |
| GO:0007166 | cell surface receptor signaling pathway                 | 5.14E-13 | 4.28E-10    | 2.14       | 12540 | 972  | 632  | 105 |
| GO:0098542 | defense response to other organism                      | 5.55E-13 | 4.33E-10    | 3.16       | 12540 | 201  | 1006 | 51  |
| GO:0045595 | regulation of cell differentiation                      | 6.08E-13 | 4.46E-10    | 2.13       | 12540 | 1096 | 563  | 105 |
| GO:0051094 | positive regulation of developmental process            | 2.76E-12 | 1.91E-09    | 2.01       | 12540 | 832  | 863  | 115 |
| GO:0050896 | response to stimulus                                    | 8.75E-12 | 5.75E-09    | 1.43       | 12540 | 2501 | 1101 | 315 |
| GO:0035456 | response to interferon-beta                             | 1.82E-11 | 1.14E-08    | 8.66       | 12540 | 28   | 827  | 16  |
| GO:0042127 | regulation of cell proliferation                        | 1.99E-11 | 1.18E-08    | 1.83       | 12540 | 995  | 937  | 136 |
| GO:0034097 | response to cytokine                                    | 7.10E-11 | 4.02E-08    | 9.6        | 12540 | 199  | 105  | 16  |
| GO:0002252 | immune effector process                                 | 2.50E-10 | 1.35E-07    | 14.1       | 12540 | 232  | 46   | 12  |
| GO:0002682 | regulation of immune system process                     | 2.69E-10 | 1.40E-07    | 1.79       | 12540 | 773  | 1180 | 130 |
| GO:0051270 | regulation of cellular component movement               | 4.61E-10 | 2.30E-07    | 2.58       | 12540 | 531  | 522  | 57  |
| GO:0035458 | cellular response to interferon-beta                    | 7.40E-10 | 3.55E-07    | 13.72      | 12540 | 23   | 437  | 11  |
| GO:0048525 | negative regulation of viral process                    | 7.95E-10 | 3.67E-07    | 10.31      | 12540 | 66   | 258  | 14  |
| GO:0051960 | regulation of nervous system development                | 1.25E-09 | 5.58E-07    | 2.38       | 12540 | 589  | 563  | 63  |
| GO:0051241 | negative regulation of multicellular organismal process | 1.30E-09 | 5.59E-07    | 2.43       | 12540 | 688  | 458  | 61  |

|            |                                                 |          |          |       |       |      |      |     |
|------------|-------------------------------------------------|----------|----------|-------|-------|------|------|-----|
| GO:0045597 | positive regulation of cell differentiation     | 1.59E-09 | 6.62E-07 | 1.84  | 12540 | 609  | 1233 | 110 |
| GO:0022610 | biological adhesion                             | 1.75E-09 | 7.03E-07 | 2.09  | 12540 | 575  | 847  | 81  |
| GO:0043901 | negative regulation of multi-organism process   | 1.88E-09 | 7.33E-07 | 7.44  | 12540 | 111  | 258  | 17  |
| GO:0048584 | positive regulation of response to stimulus     | 2.06E-09 | 7.79E-07 | 1.57  | 12540 | 1222 | 1180 | 181 |
| GO:2000145 | regulation of cell motility                     | 2.24E-09 | 8.23E-07 | 2.58  | 12540 | 493  | 522  | 53  |
| GO:0045087 | innate immune response                          | 2.29E-09 | 8.15E-07 | 11.84 | 12540 | 227  | 56   | 12  |
| GO:0040011 | locomotion                                      | 2.49E-09 | 8.62E-07 | 2.07  | 12540 | 568  | 863  | 81  |
| GO:0040012 | regulation of locomotion                        | 3.06E-09 | 1.03E-06 | 2.48  | 12540 | 543  | 522  | 56  |
| GO:0030334 | regulation of cell migration                    | 4.06E-09 | 1.33E-06 | 2.6   | 12540 | 472  | 522  | 51  |
| GO:0010033 | response to organic substance                   | 4.27E-09 | 1.36E-06 | 1.77  | 12540 | 951  | 896  | 120 |
| GO:0048583 | regulation of response to stimulus              | 4.45E-09 | 1.39E-06 | 1.46  | 12540 | 2224 | 874  | 227 |
| GO:0006950 | response to stress                              | 4.90E-09 | 1.49E-06 | 1.47  | 12540 | 1613 | 1219 | 230 |
| GO:0006954 | inflammatory response                           | 6.01E-09 | 1.79E-06 | 2.46  | 12540 | 209  | 1242 | 51  |
| GO:0045071 | negative regulation of viral genome replication | 7.69E-09 | 2.23E-06 | 14.73 | 12540 | 33   | 258  | 10  |
| GO:0048519 | negative regulation of biological process       | 8.36E-09 | 2.37E-06 | 1.32  | 12540 | 3021 | 1134 | 361 |
| GO:0050767 | regulation of neurogenesis                      | 9.68E-09 | 2.68E-06 | 2.38  | 12540 | 520  | 578  | 57  |
| GO:0042221 | response to chemical                            | 1.00E-08 | 2.72E-06 | 1.59  | 12540 | 1226 | 1050 | 163 |
| GO:0048518 | positive regulation of biological process       | 1.29E-08 | 3.43E-06 | 1.26  | 12540 | 3582 | 1262 | 456 |
| GO:0007155 | cell adhesion                                   | 1.40E-08 | 3.64E-06 | 2.03  | 12540 | 569  | 847  | 78  |
| GO:0007165 | signal transduction                             | 1.41E-08 | 3.58E-06 | 1.46  | 12540 | 2178 | 874  | 221 |
| GO:0016477 | cell migration                                  | 3.02E-08 | 7.54E-06 | 2.19  | 12540 | 463  | 779  | 63  |
| GO:0048870 | cell motility                                   | 3.14E-08 | 7.68E-06 | 2.14  | 12540 | 496  | 779  | 66  |
| GO:0002685 | regulation of leukocyte migration               | 4.00E-08 | 9.60E-06 | 4.71  | 12540 | 107  | 522  | 21  |
| GO:0030595 | leukocyte chemotaxis                            | 4.49E-08 | 1.06E-05 | 4.45  | 12540 | 70   | 845  | 21  |
| GO:0002684 | positive regulation of immune system process    | 4.50E-08 | 1.04E-05 | 1.92  | 12540 | 453  | 1180 | 82  |
| GO:0048523 | negative regulation of cellular process         | 4.51E-08 | 1.02E-05 | 1.31  | 12540 | 2813 | 1223 | 359 |
| GO:1903901 | negative regulation of viral life cycle         | 6.31E-08 | 1.41E-05 | 9.26  | 12540 | 63   | 258  | 12  |
| GO:0071310 | cellular response to organic substance          | 7.45E-08 | 1.63E-05 | 1.96  | 12540 | 563  | 873  | 77  |
| GO:0019221 | cytokine-mediated signaling pathway             | 7.49E-08 | 1.61E-05 | 3.59  | 12540 | 146  | 622  | 26  |
| GO:1902105 | regulation of leukocyte differentiation         | 8.77E-08 | 1.85E-05 | 2.71  | 12540 | 159  | 1076 | 37  |
| GO:0032879 | regulation of localization                      | 9.94E-08 | 2.07E-05 | 1.46  | 12540 | 1577 | 1087 | 200 |
| GO:0070098 | chemokine-mediated signaling pathway            | 1.44E-07 | 2.95E-05 | 10.01 | 12540 | 24   | 522  | 10  |
| GO:0043900 | regulation of multi-organism process            | 1.47E-07 | 2.96E-05 | 4.76  | 12540 | 291  | 172  | 19  |
| GO:0060284 | regulation of cell development                  | 1.75E-07 | 3.46E-05 | 2.1   | 12540 | 639  | 588  | 63  |

|            |                                                                    |          |          |        |       |      |      |     |
|------------|--------------------------------------------------------------------|----------|----------|--------|-------|------|------|-----|
| GO:0065007 | biological regulation                                              | 1.88E-07 | 3.66E-05 | 1.16   | 12540 | 6682 | 1012 | 626 |
| GO:0008285 | negative regulation of cell proliferation                          | 1.91E-07 | 3.66E-05 | 1.89   | 12540 | 445  | 1179 | 79  |
| GO:0050792 | regulation of viral process                                        | 2.50E-07 | 4.72E-05 | 3.37   | 12540 | 114  | 882  | 27  |
| GO:0060326 | cell chemotaxis                                                    | 2.56E-07 | 4.77E-05 | 4.45   | 12540 | 108  | 522  | 20  |
| GO:0006935 | chemotaxis                                                         | 2.61E-07 | 4.79E-05 | 2.85   | 12540 | 171  | 850  | 33  |
| GO:0035455 | response to interferon-alpha                                       | 2.64E-07 | 4.78E-05 | 9.89   | 12540 | 15   | 761  | 9   |
| GO:0001817 | regulation of cytokine production                                  | 2.67E-07 | 4.75E-05 | 2.01   | 12540 | 340  | 1193 | 65  |
| GO:0042330 | taxis                                                              | 2.82E-07 | 4.96E-05 | 2.83   | 12540 | 172  | 850  | 33  |
| GO:0050789 | regulation of biological process                                   | 2.91E-07 | 5.05E-05 | 1.17   | 12540 | 6418 | 1012 | 604 |
| GO:0002687 | positive regulation of leukocyte migration                         | 3.96E-07 | 6.76E-05 | 5.04   | 12540 | 81   | 522  | 17  |
| GO:0048522 | positive regulation of cellular process                            | 5.02E-07 | 8.45E-05 | 1.26   | 12540 | 3191 | 1262 | 404 |
| GO:0045664 | regulation of neuron differentiation                               | 5.54E-07 | 9.22E-05 | 2.38   | 12540 | 425  | 557  | 45  |
| GO:0006928 | movement of cell or subcellular component                          | 5.55E-07 | 9.10E-05 | 1.7    | 12540 | 728  | 1045 | 103 |
| GO:0048585 | negative regulation of response to stimulus                        | 8.25E-07 | 1.34E-04 | 1.68   | 12540 | 899  | 873  | 105 |
| GO:0051093 | negative regulation of developmental process                       | 8.29E-07 | 1.33E-04 | 1.69   | 12540 | 620  | 1211 | 101 |
| GO:1903706 | regulation of hemopoiesis                                          | 8.66E-07 | 1.37E-04 | 2.31   | 12540 | 222  | 1076 | 44  |
| GO:0045069 | regulation of viral genome replication                             | 9.95E-07 | 1.55E-04 | 9.35   | 12540 | 52   | 258  | 10  |
| GO:0051962 | positive regulation of nervous system development                  | 1.36E-06 | 2.09E-04 | 2.06   | 12540 | 367  | 928  | 56  |
| GO:0070887 | cellular response to chemical stimulus                             | 1.40E-06 | 2.13E-04 | 1.75   | 12540 | 721  | 873  | 88  |
| GO:0071345 | cellular response to cytokine stimulus                             | 1.43E-06 | 2.14E-04 | 3.28   | 12540 | 115  | 830  | 25  |
| GO:2000147 | positive regulation of cell motility                               | 1.43E-06 | 2.12E-04 | 2.1    | 12540 | 285  | 1087 | 52  |
| GO:0023056 | positive regulation of signaling                                   | 1.45E-06 | 2.13E-04 | 1.64   | 12540 | 964  | 874  | 110 |
| GO:0050900 | leukocyte migration                                                | 1.67E-06 | 2.43E-04 | 3.45   | 12540 | 99   | 845  | 23  |
| GO:0008284 | positive regulation of cell proliferation                          | 2.21E-06 | 3.16E-04 | 1.83   | 12540 | 552  | 931  | 75  |
| GO:0097530 | granulocyte migration                                              | 2.28E-06 | 3.24E-04 | 5.07   | 12540 | 41   | 845  | 14  |
| GO:0035457 | cellular response to interferon-alpha                              | 2.35E-06 | 3.29E-04 | 180.87 | 12540 | 8    | 26   | 3   |
| GO:0010647 | positive regulation of cell communication                          | 2.56E-06 | 3.55E-04 | 1.59   | 12540 | 1055 | 874  | 117 |
| GO:0043903 | regulation of symbiosis, encompassing mutualism through parasitism | 2.71E-06 | 3.71E-04 | 4.01   | 12540 | 136  | 414  | 18  |
| GO:0040017 | positive regulation of locomotion                                  | 2.72E-06 | 3.69E-04 | 2.05   | 12540 | 298  | 1087 | 53  |
| GO:0009617 | response to bacterium                                              | 2.96E-06 | 3.98E-04 | 2.7    | 12540 | 122  | 1180 | 31  |
| GO:0050776 | regulation of immune response                                      | 3.45E-06 | 4.57E-04 | 1.93   | 12540 | 330  | 1180 | 60  |
| GO:0051272 | positive regulation of cellular component movement                 | 3.73E-06 | 4.89E-04 | 2.05   | 12540 | 293  | 1087 | 52  |
| GO:1903900 | regulation of viral life cycle                                     | 3.96E-06 | 5.14E-04 | 3.19   | 12540 | 107  | 882  | 24  |

|            |                                                        |          |          |       |       |      |      |     |
|------------|--------------------------------------------------------|----------|----------|-------|-------|------|------|-----|
| GO:0040013 | negative regulation of locomotion                      | 4.40E-06 | 5.65E-04 | 3.22  | 12540 | 183  | 490  | 23  |
| GO:0070208 | protein heterotrimerization                            | 4.45E-06 | 5.66E-04 | 25.68 | 12540 | 11   | 222  | 5   |
| GO:0031347 | regulation of defense response                         | 4.67E-06 | 5.88E-04 | 1.87  | 12540 | 363  | 1180 | 64  |
| GO:0032101 | regulation of response to external stimulus            | 4.69E-06 | 5.85E-04 | 1.81  | 12540 | 560  | 904  | 73  |
| GO:0050794 | regulation of cellular process                         | 4.79E-06 | 5.92E-04 | 1.16  | 12540 | 6130 | 1012 | 573 |
| GO:0030336 | negative regulation of cell migration                  | 5.44E-06 | 6.65E-04 | 3.48  | 12540 | 147  | 490  | 20  |
| GO:0030335 | positive regulation of cell migration                  | 5.46E-06 | 6.61E-04 | 2.05  | 12540 | 281  | 1087 | 50  |
| GO:0033993 | response to lipid                                      | 6.01E-06 | 7.21E-04 | 2.1   | 12540 | 320  | 896  | 48  |
| GO:0097529 | myeloid leukocyte migration                            | 7.16E-06 | 8.51E-04 | 4.17  | 12540 | 57   | 845  | 16  |
| GO:0050795 | regulation of behavior                                 | 7.27E-06 | 8.56E-04 | 2.3   | 12540 | 156  | 1259 | 36  |
| GO:2000401 | regulation of lymphocyte migration                     | 7.55E-06 | 8.80E-04 | 17.56 | 12540 | 28   | 153  | 6   |
| GO:0051049 | regulation of transport                                | 7.59E-06 | 8.77E-04 | 1.47  | 12540 | 1143 | 1094 | 147 |
| GO:0071621 | granulocyte chemotaxis                                 | 7.84E-06 | 8.97E-04 | 4.95  | 12540 | 39   | 845  | 13  |
| GO:0045596 | negative regulation of cell differentiation            | 8.24E-06 | 9.34E-04 | 1.72  | 12540 | 480  | 1197 | 79  |
| GO:0048520 | positive regulation of behavior                        | 9.07E-06 | 1.02E-03 | 2.71  | 12540 | 103  | 1259 | 28  |
| GO:0050768 | negative regulation of neurogenesis                    | 9.30E-06 | 1.04E-03 | 3.3   | 12540 | 192  | 416  | 21  |
| GO:0032496 | response to lipopolysaccharide                         | 9.75E-06 | 1.08E-03 | 2.7   | 12540 | 140  | 896  | 27  |
| GO:0051271 | negative regulation of cellular component movement     | 9.81E-06 | 1.07E-03 | 3.26  | 12540 | 165  | 490  | 21  |
| GO:0051961 | negative regulation of nervous system development      | 1.04E-05 | 1.13E-03 | 3.19  | 12540 | 208  | 416  | 22  |
| GO:0042742 | defense response to bacterium                          | 1.05E-05 | 1.13E-03 | 2.76  | 12540 | 104  | 1180 | 27  |
| GO:0009967 | positive regulation of signal transduction             | 1.12E-05 | 1.20E-03 | 1.63  | 12540 | 856  | 874  | 97  |
| GO:2000146 | negative regulation of cell motility                   | 1.24E-05 | 1.31E-03 | 3.35  | 12540 | 153  | 490  | 20  |
| GO:1990266 | neutrophil migration                                   | 1.35E-05 | 1.42E-03 | 5.09  | 12540 | 35   | 845  | 12  |
| GO:0050920 | regulation of chemotaxis                               | 1.53E-05 | 1.59E-03 | 2.98  | 12540 | 117  | 862  | 24  |
| GO:0022603 | regulation of anatomical structure morphogenesis       | 1.67E-05 | 1.72E-03 | 2.04  | 12540 | 638  | 473  | 49  |
| GO:1901342 | regulation of vasculature development                  | 1.68E-05 | 1.72E-03 | 3.14  | 12540 | 151  | 556  | 21  |
| GO:0023051 | regulation of signaling                                | 1.83E-05 | 1.86E-03 | 1.41  | 12540 | 1825 | 808  | 166 |
| GO:0010646 | regulation of cell communication                       | 1.94E-05 | 1.95E-03 | 1.38  | 12540 | 1935 | 874  | 186 |
| GO:0044707 | single-multicellular organism process                  | 1.97E-05 | 1.97E-03 | 1.36  | 12540 | 1723 | 1099 | 205 |
| GO:0003008 | system process                                         | 2.07E-05 | 2.05E-03 | 1.69  | 12540 | 571  | 1025 | 79  |
| GO:0009966 | regulation of signal transduction                      | 2.07E-05 | 2.03E-03 | 1.42  | 12540 | 1615 | 874  | 160 |
| GO:0002237 | response to molecule of bacterial origin               | 2.14E-05 | 2.09E-03 | 2.99  | 12540 | 155  | 596  | 22  |
| GO:0090090 | negative regulation of canonical Wnt signaling pathway | 2.28E-05 | 2.21E-03 | 4.14  | 12540 | 67   | 678  | 15  |
| GO:0030111 | regulation of Wnt signaling pathway                    | 2.32E-05 | 2.23E-03 | 2.89  | 12540 | 159  | 628  | 23  |

|            |                                                        |          |          |        |       |      |      |     |
|------------|--------------------------------------------------------|----------|----------|--------|-------|------|------|-----|
| GO:0010648 | negative regulation of cell communication              | 2.47E-05 | 2.35E-03 | 1.63   | 12540 | 782  | 873  | 89  |
| GO:0045785 | positive regulation of cell adhesion                   | 2.55E-05 | 2.41E-03 | 2.01   | 12540 | 239  | 1176 | 45  |
| GO:0030155 | regulation of cell adhesion                            | 2.62E-05 | 2.45E-03 | 1.74   | 12540 | 422  | 1176 | 69  |
| GO:0050890 | cognition                                              | 2.71E-05 | 2.53E-03 | 2.31   | 12540 | 175  | 1025 | 33  |
| GO:0002028 | regulation of sodium ion transport                     | 2.79E-05 | 2.58E-03 | 5.66   | 12540 | 54   | 451  | 11  |
| GO:0001819 | positive regulation of cytokine production             | 2.83E-05 | 2.59E-03 | 2.05   | 12540 | 215  | 1193 | 42  |
| GO:0032501 | multicellular organismal process                       | 2.83E-05 | 2.58E-03 | 1.35   | 12540 | 1733 | 1099 | 205 |
| GO:2000404 | regulation of T cell migration                         | 3.05E-05 | 2.75E-03 | 19.51  | 12540 | 21   | 153  | 5   |
| GO:0008202 | steroid metabolic process                              | 3.13E-05 | 2.81E-03 | 2.51   | 12540 | 119  | 1219 | 29  |
| GO:0023057 | negative regulation of signaling                       | 3.14E-05 | 2.80E-03 | 1.63   | 12540 | 776  | 873  | 88  |
| GO:0030178 | negative regulation of Wnt signaling pathway           | 3.33E-05 | 2.94E-03 | 3.66   | 12540 | 86   | 678  | 17  |
| GO:0002688 | regulation of leukocyte chemotaxis                     | 3.41E-05 | 3.00E-03 | 4.66   | 12540 | 67   | 522  | 13  |
| GO:0045665 | negative regulation of neuron differentiation          | 3.45E-05 | 3.01E-03 | 3.53   | 12540 | 145  | 416  | 17  |
| GO:0050921 | positive regulation of chemotaxis                      | 3.54E-05 | 3.07E-03 | 2.75   | 12540 | 87   | 1259 | 24  |
| GO:0016125 | sterol metabolic process                               | 3.86E-05 | 3.32E-03 | 2.96   | 12540 | 73   | 1219 | 21  |
| GO:0002828 | regulation of type 2 immune response                   | 4.46E-05 | 3.81E-03 | 5.87   | 12540 | 20   | 961  | 9   |
| GO:0014015 | positive regulation of gliogenesis                     | 4.48E-05 | 3.80E-03 | 4.01   | 12540 | 48   | 911  | 14  |
| GO:0001911 | negative regulation of leukocyte mediated cytotoxicity | 4.55E-05 | 3.83E-03 | 29.23  | 12540 | 13   | 132  | 4   |
| GO:0031342 | negative regulation of cell killing                    | 4.55E-05 | 3.81E-03 | 29.23  | 12540 | 13   | 132  | 4   |
| GO:0030593 | neutrophil chemotaxis                                  | 4.70E-05 | 3.91E-03 | 4.95   | 12540 | 33   | 845  | 11  |
| GO:0050877 | neurological system process                            | 5.19E-05 | 4.29E-03 | 1.8    | 12540 | 401  | 1025 | 59  |
| GO:0080134 | regulation of response to stress                       | 5.29E-05 | 4.34E-03 | 1.49   | 12540 | 848  | 1183 | 119 |
| GO:0045765 | regulation of angiogenesis                             | 5.43E-05 | 4.43E-03 | 3.08   | 12540 | 139  | 556  | 19  |
| GO:0050769 | positive regulation of neurogenesis                    | 6.08E-05 | 4.92E-03 | 2.44   | 12540 | 315  | 473  | 29  |
| GO:0071347 | cellular response to interleukin-1                     | 6.49E-05 | 5.22E-03 | 8.31   | 12540 | 19   | 556  | 7   |
| GO:0010817 | regulation of hormone levels                           | 6.90E-05 | 5.51E-03 | 2.58   | 12540 | 119  | 1061 | 26  |
| GO:0034340 | response to type I interferon                          | 6.94E-05 | 5.52E-03 | 119.43 | 12540 | 2    | 105  | 2   |
| GO:0010959 | regulation of metal ion transport                      | 7.29E-05 | 5.76E-03 | 2.81   | 12540 | 216  | 454  | 22  |
| GO:0002683 | negative regulation of immune system process           | 8.13E-05 | 6.37E-03 | 2.04   | 12540 | 265  | 927  | 40  |
| GO:0008203 | cholesterol metabolic process                          | 8.86E-05 | 6.90E-03 | 3.29   | 12540 | 66   | 983  | 17  |
| GO:0055065 | metal ion homeostasis                                  | 8.98E-05 | 6.96E-03 | 2.43   | 12540 | 267  | 542  | 28  |
| GO:0043271 | negative regulation of ion transport                   | 9.62E-05 | 7.41E-03 | 4.64   | 12540 | 78   | 416  | 12  |
| GO:1901701 | cellular response to oxygen-containing compound        | 9.99E-05 | 7.64E-03 | 1.91   | 12540 | 354  | 873  | 47  |
| GO:2000402 | negative regulation of lymphocyte migration            | 1.09E-04 | 8.29E-03 | 152    | 12540 | 3    | 55   | 2   |

|            |                                                        |          |          |       |       |      |      |     |
|------------|--------------------------------------------------------|----------|----------|-------|-------|------|------|-----|
| GO:0007611 | learning or memory                                     | 1.15E-04 | 8.72E-03 | 2.27  | 12540 | 156  | 1025 | 29  |
| GO:0010721 | negative regulation of cell development                | 1.21E-04 | 9.11E-03 | 2.28  | 12540 | 226  | 731  | 30  |
| GO:0002690 | positive regulation of leukocyte chemotaxis            | 1.22E-04 | 9.13E-03 | 4.8   | 12540 | 55   | 522  | 11  |
| GO:0010720 | positive regulation of cell development                | 1.26E-04 | 9.32E-03 | 1.86  | 12540 | 382  | 863  | 49  |
| GO:0055082 | cellular chemical homeostasis                          | 1.31E-04 | 9.63E-03 | 2.05  | 12540 | 291  | 798  | 38  |
|            | antigen processing and presentation of exogenous       |          |          |       |       |      |      |     |
| GO:0042590 | peptide antigen via MHC class I                        | 1.37E-04 | 1.00E-02 | 9.02  | 12540 | 6    | 1158 | 5   |
| GO:0000902 | cell morphogenesis                                     | 1.39E-04 | 1.02E-02 | 2.58  | 12540 | 164  | 681  | 23  |
| GO:0019934 | cGMP-mediated signaling                                | 1.45E-04 | 1.05E-02 | 8.89  | 12540 | 6    | 1176 | 5   |
| GO:0043269 | regulation of ion transport                            | 1.52E-04 | 1.10E-02 | 2.29  | 12540 | 362  | 454  | 30  |
| GO:0044708 | single-organism behavior                               | 1.56E-04 | 1.12E-02 | 1.84  | 12540 | 284  | 1152 | 48  |
| GO:0030199 | collagen fibril organization                           | 1.66E-04 | 1.19E-02 | 52.25 | 12540 | 24   | 30   | 3   |
| GO:0030003 | cellular cation homeostasis                            | 1.74E-04 | 1.23E-02 | 2.03  | 12540 | 256  | 894  | 37  |
| GO:0045088 | regulation of innate immune response                   | 1.75E-04 | 1.23E-02 | 6.21  | 12540 | 122  | 149  | 9   |
| GO:0030198 | extracellular matrix organization                      | 1.86E-04 | 1.30E-02 | 2.56  | 12540 | 121  | 972  | 24  |
| GO:1902107 | positive regulation of leukocyte differentiation       | 1.91E-04 | 1.33E-02 | 2.72  | 12540 | 90   | 1076 | 21  |
| GO:0051130 | positive regulation of cellular component organization | 1.93E-04 | 1.34E-02 | 1.53  | 12540 | 901  | 867  | 95  |
| GO:0015804 | neutral amino acid transport                           | 1.94E-04 | 1.34E-02 | 9.4   | 12540 | 23   | 348  | 6   |
| GO:0032103 | positive regulation of response to external stimulus   | 1.97E-04 | 1.35E-02 | 2.07  | 12540 | 267  | 793  | 35  |
| GO:0006875 | cellular metal ion homeostasis                         | 2.07E-04 | 1.41E-02 | 2.17  | 12540 | 224  | 798  | 31  |
| GO:0050865 | regulation of cell activation                          | 2.08E-04 | 1.41E-02 | 2.32  | 12540 | 304  | 497  | 28  |
| GO:0043062 | extracellular structure organization                   | 2.19E-04 | 1.47E-02 | 2.54  | 12540 | 122  | 972  | 24  |
| GO:0051216 | cartilage development                                  | 2.27E-04 | 1.53E-02 | 209   | 12540 | 60   | 2    | 2   |
| GO:1903708 | positive regulation of hemopoiesis                     | 2.44E-04 | 1.63E-02 | 2.5   | 12540 | 112  | 1076 | 24  |
| GO:0050870 | positive regulation of T cell activation               | 2.56E-04 | 1.70E-02 | 3.69  | 12540 | 101  | 471  | 14  |
| GO:0032020 | ISG15-protein conjugation                              | 2.66E-04 | 1.76E-02 | 28.07 | 12540 | 5    | 268  | 3   |
| GO:1903792 | negative regulation of anion transport                 | 2.78E-04 | 1.83E-02 | 6.98  | 12540 | 25   | 503  | 7   |
| GO:0098602 | single organism cell adhesion                          | 2.79E-04 | 1.82E-02 | 1.82  | 12540 | 300  | 1082 | 47  |
| GO:0006873 | cellular ion homeostasis                               | 2.79E-04 | 1.81E-02 | 1.99  | 12540 | 261  | 894  | 37  |
| GO:1901699 | cellular response to nitrogen compound                 | 2.86E-04 | 1.85E-02 | 2.77  | 12540 | 188  | 458  | 19  |
| GO:0035929 | steroid hormone secretion                              | 2.87E-04 | 1.84E-02 | 93.93 | 12540 | 3    | 89   | 2   |
| GO:0051128 | regulation of cellular component organization          | 2.89E-04 | 1.85E-02 | 1.36  | 12540 | 1657 | 873  | 157 |
| GO:0006721 | terpenoid metabolic process                            | 2.90E-04 | 1.84E-02 | 4.41  | 12540 | 29   | 980  | 10  |
| GO:0050778 | positive regulation of immune response                 | 2.91E-04 | 1.84E-02 | 1.89  | 12540 | 231  | 1180 | 41  |

|            |                                                                    |          |          |        |       |     |      |    |
|------------|--------------------------------------------------------------------|----------|----------|--------|-------|-----|------|----|
| GO:0015825 | L-serine transport                                                 | 2.91E-04 | 1.83E-02 | 27.26  | 12540 | 5   | 276  | 3  |
| GO:0001503 | ossification                                                       | 2.96E-04 | 1.86E-02 | 6.45   | 12540 | 71  | 219  | 8  |
| GO:0042445 | hormone metabolic process                                          | 2.97E-04 | 1.85E-02 | 3      | 12540 | 67  | 1061 | 17 |
| GO:0001910 | regulation of leukocyte mediated cytotoxicity                      | 3.07E-04 | 1.90E-02 | 12.84  | 12540 | 37  | 132  | 5  |
| GO:0071417 | cellular response to organonitrogen compound                       | 3.13E-04 | 1.93E-02 | 2.85   | 12540 | 173 | 458  | 18 |
| GO:0014013 | regulation of gliogenesis                                          | 3.13E-04 | 1.93E-02 | 2.91   | 12540 | 85  | 911  | 18 |
| GO:0070206 | protein trimerization                                              | 3.19E-04 | 1.95E-02 | 8.93   | 12540 | 30  | 281  | 6  |
| GO:0031349 | positive regulation of defense response                            | 3.38E-04 | 2.06E-02 | 2.11   | 12540 | 146 | 1180 | 29 |
| GO:0071222 | cellular response to lipopolysaccharide                            | 3.38E-04 | 2.05E-02 | 3.3    | 12540 | 69  | 827  | 15 |
| GO:0018149 | peptide cross-linking                                              | 3.38E-04 | 2.04E-02 | 17.71  | 12540 | 16  | 177  | 4  |
| GO:1902930 | regulation of alcohol biosynthetic process                         | 3.41E-04 | 2.04E-02 | 3.74   | 12540 | 39  | 1032 | 12 |
| GO:0009719 | response to endogenous stimulus                                    | 3.43E-04 | 2.05E-02 | 1.63   | 12540 | 506 | 1017 | 67 |
| GO:1902993 | positive regulation of amyloid precursor protein catabolic process | 3.46E-04 | 2.05E-02 | 23.17  | 12540 | 4   | 406  | 3  |
| GO:1902004 | positive regulation of beta-amyloid formation                      | 3.46E-04 | 2.04E-02 | 23.17  | 12540 | 4   | 406  | 3  |
| GO:0002716 | negative regulation of natural killer cell mediated immunity       | 3.48E-04 | 2.05E-02 | 33.86  | 12540 | 11  | 101  | 3  |
| GO:0045953 | negative regulation of natural killer cell mediated cytotoxicity   | 3.48E-04 | 2.04E-02 | 33.86  | 12540 | 11  | 101  | 3  |
| GO:0051050 | positive regulation of transport                                   | 3.68E-04 | 2.14E-02 | 1.54   | 12540 | 626 | 1094 | 84 |
| GO:0019731 | antibacterial humoral response                                     | 3.71E-04 | 2.15E-02 | 7.37   | 12540 | 14  | 729  | 6  |
| GO:0009968 | negative regulation of signal transduction                         | 3.75E-04 | 2.17E-02 | 1.57   | 12540 | 703 | 873  | 77 |
| GO:0098771 | inorganic ion homeostasis                                          | 3.86E-04 | 2.22E-02 | 1.87   | 12540 | 315 | 894  | 42 |
| GO:1901700 | response to oxygen-containing compound                             | 3.87E-04 | 2.22E-02 | 1.61   | 12540 | 608 | 896  | 70 |
| GO:0009611 | response to wounding                                               | 3.88E-04 | 2.21E-02 | 5.44   | 12540 | 85  | 244  | 9  |
| GO:0007162 | negative regulation of cell adhesion                               | 3.90E-04 | 2.21E-02 | 2.12   | 12540 | 158 | 1087 | 29 |
| GO:0055074 | calcium ion homeostasis                                            | 3.92E-04 | 2.21E-02 | 2.61   | 12540 | 177 | 542  | 20 |
| GO:2000242 | negative regulation of reproductive process                        | 3.93E-04 | 2.21E-02 | 160.77 | 12540 | 26  | 6    | 2  |
| GO:0034112 | positive regulation of homotypic cell-cell adhesion                | 3.98E-04 | 2.23E-02 | 3.55   | 12540 | 105 | 471  | 14 |
| GO:1903039 | positive regulation of leukocyte cell-cell adhesion                | 3.98E-04 | 2.22E-02 | 3.55   | 12540 | 105 | 471  | 14 |
| GO:0032608 | interferon-beta production                                         | 3.99E-04 | 2.21E-02 | 79.62  | 12540 | 3   | 105  | 2  |
| GO:0055080 | cation homeostasis                                                 | 4.09E-04 | 2.26E-02 | 1.89   | 12540 | 305 | 894  | 41 |
| GO:0022407 | regulation of cell-cell adhesion                                   | 4.13E-04 | 2.27E-02 | 1.9    | 12540 | 237 | 1087 | 39 |
| GO:0051249 | regulation of lymphocyte activation                                | 4.13E-04 | 2.26E-02 | 1.9    | 12540 | 237 | 1087 | 39 |
| GO:0034341 | response to interferon-gamma                                       | 4.18E-04 | 2.28E-02 | 4.28   | 12540 | 32  | 916  | 10 |

|            |                                                     |          |          |       |       |     |      |    |
|------------|-----------------------------------------------------|----------|----------|-------|-------|-----|------|----|
| GO:0048246 | macrophage chemotaxis                               | 4.24E-04 | 2.30E-02 | 30.07 | 12540 | 9   | 139  | 3  |
|            | negative regulation of protein import into nucleus, |          |          |       |       |     |      |    |
| GO:0033159 | translocation                                       | 4.30E-04 | 2.32E-02 | 16.48 | 12540 | 3   | 761  | 3  |
| GO:0048247 | lymphocyte chemotaxis                               | 4.37E-04 | 2.35E-02 | 31.99 | 12540 | 12  | 98   | 3  |
| GO:2000551 | regulation of T-helper 2 cell cytokine production   | 4.37E-04 | 2.34E-02 | 16.37 | 12540 | 3   | 766  | 3  |
| GO:0045472 | response to ether                                   | 4.41E-04 | 2.35E-02 | 59.15 | 12540 | 2   | 212  | 2  |
| GO:0019882 | antigen processing and presentation                 | 4.43E-04 | 2.35E-02 | 2.88  | 12540 | 64  | 1158 | 17 |
| GO:0002703 | regulation of leukocyte mediated immunity           | 4.46E-04 | 2.36E-02 | 2.41  | 12540 | 114 | 1097 | 24 |
| GO:2000739 | regulation of mesenchymal stem cell differentiation | 4.53E-04 | 2.39E-02 | 11.6  | 12540 | 6   | 721  | 4  |
| GO:0090025 | regulation of monocyte chemotaxis                   | 4.55E-04 | 2.38E-02 | 5.55  | 12540 | 14  | 1129 | 7  |
| GO:1902003 | regulation of beta-amyloid formation                | 4.66E-04 | 2.43E-02 | 13.73 | 12540 | 9   | 406  | 4  |
| GO:0051046 | regulation of secretion                             | 4.71E-04 | 2.45E-02 | 2     | 12540 | 439 | 514  | 36 |
| GO:0044406 | adhesion of symbiont to host                        | 4.77E-04 | 2.47E-02 | 8.42  | 12540 | 9   | 827  | 5  |
| GO:0007167 | enzyme linked receptor protein signaling pathway    | 4.82E-04 | 2.48E-02 | 1.93  | 12540 | 323 | 763  | 38 |
| GO:0048731 | system development                                  | 4.86E-04 | 2.50E-02 | 1.76  | 12540 | 458 | 795  | 51 |
| GO:0019369 | arachidonic acid metabolic process                  | 4.89E-04 | 2.50E-02 | 4.94  | 12540 | 19  | 1069 | 8  |
| GO:1903530 | regulation of secretion by cell                     | 4.97E-04 | 2.53E-02 | 2.03  | 12540 | 408 | 514  | 34 |
| GO:0051251 | positive regulation of lymphocyte activation        | 4.98E-04 | 2.52E-02 | 2.1   | 12540 | 148 | 1129 | 28 |
| GO:0090026 | positive regulation of monocyte chemotaxis          | 5.02E-04 | 2.53E-02 | 14.29 | 12540 | 11  | 319  | 4  |
| GO:0061326 | renal tubule development                            | 5.06E-04 | 2.54E-02 | 97.21 | 12540 | 6   | 43   | 2  |
| GO:0071396 | cellular response to lipid                          | 5.09E-04 | 2.55E-02 | 2.24  | 12540 | 162 | 862  | 25 |
| GO:0034754 | cellular hormone metabolic process                  | 5.09E-04 | 2.54E-02 | 3.62  | 12540 | 41  | 1014 | 12 |
| GO:0060828 | regulation of canonical Wnt signaling pathway       | 5.23E-04 | 2.60E-02 | 2.87  | 12540 | 116 | 678  | 18 |
| GO:0031341 | regulation of cell killing                          | 5.26E-04 | 2.60E-02 | 11.59 | 12540 | 41  | 132  | 5  |
| GO:1903522 | regulation of blood circulation                     | 5.38E-04 | 2.65E-02 | 2.37  | 12540 | 114 | 1112 | 24 |
| GO:0010942 | positive regulation of cell death                   | 5.41E-04 | 2.66E-02 | 1.68  | 12540 | 463 | 937  | 58 |
| GO:0050801 | ion homeostasis                                     | 5.45E-04 | 2.66E-02 | 1.83  | 12540 | 329 | 894  | 43 |
| GO:0006874 | cellular calcium ion homeostasis                    | 5.57E-04 | 2.71E-02 | 2.6   | 12540 | 169 | 542  | 19 |
| GO:0044057 | regulation of system process                        | 5.63E-04 | 2.73E-02 | 1.82  | 12540 | 256 | 1129 | 42 |
| GO:0072503 | cellular divalent inorganic cation homeostasis      | 5.71E-04 | 2.76E-02 | 2.54  | 12540 | 182 | 542  | 20 |
| GO:0019730 | antimicrobial humoral response                      | 5.84E-04 | 2.81E-02 | 6.88  | 12540 | 15  | 729  | 6  |
| GO:0002830 | positive regulation of type 2 immune response       | 5.86E-04 | 2.81E-02 | 12.81 | 12540 | 9   | 435  | 4  |
| GO:0034446 | substrate adhesion-dependent cell spreading         | 5.86E-04 | 2.80E-02 | 6.14  | 12540 | 25  | 572  | 7  |
| GO:1901623 | regulation of lymphocyte chemotaxis                 | 5.88E-04 | 2.80E-02 | 29.53 | 12540 | 13  | 98   | 3  |

|            |                                                          |          |          |          |       |     |      |    |
|------------|----------------------------------------------------------|----------|----------|----------|-------|-----|------|----|
| GO:0032329 | serine transport                                         | 5.88E-04 | 2.79E-02 | 22.72    | 12540 | 6   | 276  | 3  |
| GO:0071346 | cellular response to interferon-gamma                    | 5.90E-04 | 2.79E-02 | 5.64     | 12540 | 17  | 916  | 7  |
| GO:1902563 | regulation of neutrophil activation                      | 5.93E-04 | 2.79E-02 | 9.72     | 12540 | 5   | 1032 | 4  |
| GO:0043270 | positive regulation of ion transport                     | 5.99E-04 | 2.81E-02 | 2.87     | 12540 | 155 | 451  | 16 |
| GO:0072507 | divalent inorganic cation homeostasis                    | 6.04E-04 | 2.82E-02 | 2.47     | 12540 | 197 | 542  | 21 |
| GO:0050867 | positive regulation of cell activation                   | 6.52E-04 | 3.03E-02 | 2.66     | 12540 | 178 | 476  | 18 |
| GO:0034367 | macromolecular complex remodeling                        | 6.60E-04 | 3.06E-02 | 7.8      | 12540 | 9   | 893  | 5  |
| GO:0034368 | protein-lipid complex remodeling                         | 6.60E-04 | 3.05E-02 | 7.8      | 12540 | 9   | 893  | 5  |
| GO:0034369 | plasma lipoprotein particle remodeling                   | 6.60E-04 | 3.04E-02 | 7.8      | 12540 | 9   | 893  | 5  |
| GO:0010243 | response to organonitrogen compound                      | 6.94E-04 | 3.18E-02 | 2.27     | 12540 | 301 | 458  | 25 |
| GO:0001957 | intramembranous ossification                             | 6.96E-04 | 3.18E-02 | 4 180.00 | 12540 | 3   | 1    | 1  |
| GO:0036072 | direct ossification                                      | 6.96E-04 | 3.17E-02 | 4 180.00 | 12540 | 3   | 1    | 1  |
|            | antigen processing and presentation of peptide           |          |          |          |       |     |      |    |
| GO:0002474 | antigen via MHC class I                                  | 7.03E-04 | 3.19E-02 | 4.24     | 12540 | 23  | 1158 | 9  |
|            | positive regulation of type I interferon-mediated        |          |          |          |       |     |      |    |
| GO:0060340 | signaling pathway                                        | 7.12E-04 | 3.21E-02 | 89.57    | 12540 | 7   | 40   | 2  |
| GO:0043588 | skin development                                         | 7.54E-04 | 3.39E-02 | 119.43   | 12540 | 30  | 7    | 2  |
| GO:0034110 | regulation of homotypic cell-cell adhesion               | 7.98E-04 | 3.58E-02 | 1.95     | 12540 | 182 | 1129 | 32 |
|            | regulation of atrial cardiac muscle cell membrane        |          |          |          |       |     |      |    |
| GO:0060371 | depolarization                                           | 8.26E-04 | 3.69E-02 | 65.31    | 12540 | 3   | 128  | 2  |
| GO:1902533 | positive regulation of intracellular signal transduction | 8.61E-04 | 3.83E-02 | 1.52     | 12540 | 568 | 1148 | 79 |
| GO:0006720 | isoprenoid metabolic process                             | 9.25E-04 | 4.10E-02 | 3.41     | 12540 | 45  | 980  | 12 |
| GO:0044087 | regulation of cellular component biogenesis              | 9.28E-04 | 4.10E-02 | 2.12     | 12540 | 505 | 340  | 29 |
| GO:0001568 | blood vessel development                                 | 9.30E-04 | 4.10E-02 | 3.86     | 12540 | 63  | 567  | 11 |
| GO:0043589 | skin morphogenesis                                       | 9.36E-04 | 4.11E-02 | 83.6     | 12540 | 10  | 30   | 2  |
| GO:0048002 | antigen processing and presentation of peptide antigen   | 9.47E-04 | 4.14E-02 | 3.33     | 12540 | 39  | 1158 | 12 |
| GO:0034240 | negative regulation of macrophage fusion                 | 9.57E-04 | 4.17E-02 | 1 045.00 | 12540 | 1   | 12   | 1  |
| GO:0006695 | cholesterol biosynthetic process                         | 9.62E-04 | 4.18E-02 | 4.09     | 12540 | 24  | 1150 | 9  |
| GO:1903034 | regulation of response to wounding                       | 9.69E-04 | 4.20E-02 | 1.92     | 12540 | 247 | 897  | 34 |
| GO:0016126 | sterol biosynthetic process                              | 9.87E-04 | 4.26E-02 | 4.23     | 12540 | 29  | 920  | 9  |
| GO:0032332 | positive regulation of chondrocyte differentiation       | 9.88E-04 | 4.25E-02 | 11.04    | 12540 | 9   | 505  | 4  |
| GO:0071495 | cellular response to endogenous stimulus                 | 9.89E-04 | 4.24E-02 | 2.15     | 12540 | 311 | 506  | 27 |

**Molecular functions**

| <b>GO Term</b> | <b>Description</b>                                          | <b>p-value</b> | <b>FDR q-value</b> | <b>Enrichment</b> | <b>N</b> | <b>B</b> | <b>n</b> | <b>b</b> |
|----------------|-------------------------------------------------------------|----------------|--------------------|-------------------|----------|----------|----------|----------|
| GO:0042379     | chemokine receptor binding                                  | 5.77E-08       | 2.49E-04           | 7.45              | 12540    | 35       | 625      | 13       |
| GO:0005539     | glycosaminoglycan binding                                   | 1.43E-07       | 3.09E-04           | 4.41              | 12540    | 115      | 519      | 21       |
| GO:0008009     | chemokine activity                                          | 1.56E-07       | 2.25E-04           | 8.49              | 12540    | 26       | 625      | 11       |
| GO:0048020     | CCR chemokine receptor binding                              | 7.52E-07       | 8.12E-04           | 39.99             | 12540    | 16       | 98       | 5        |
| GO:0005125     | cytokine activity                                           | 8.29E-07       | 7.16E-04           | 3.73              | 12540    | 95       | 779      | 22       |
| GO:0005515     | protein binding                                             | 9.33E-07       | 6.71E-04           | 1.16              | 12540    | 5561     | 1262     | 651      |
| GO:0048407     | platelet-derived growth factor binding                      | 1.78E-06       | 1.10E-03           | 29.16             | 12540    | 10       | 215      | 5        |
| GO:0005102     | receptor binding                                            | 1.89E-06       | 1.02E-03           | 1.67              | 12540    | 912      | 831      | 101      |
| GO:0008201     | heparin binding                                             | 3.03E-06       | 1.46E-03           | 4.66              | 12540    | 83       | 519      | 16       |
| GO:0005126     | cytokine receptor binding                                   | 3.56E-06       | 1.54E-03           | 3.04              | 12540    | 165      | 625      | 25       |
| GO:0004872     | receptor activity                                           | 9.66E-06       | 3.79E-03           | 2.09              | 12540    | 528      | 545      | 48       |
| GO:1901681     | sulfur compound binding                                     | 1.38E-05       | 4.95E-03           | 3.1               | 12540    | 157      | 567      | 22       |
| GO:0060089     | molecular transducer activity                               | 1.56E-05       | 5.17E-03           | 1.91              | 12540    | 699      | 545      | 58       |
| GO:0038023     | signaling receptor activity                                 | 2.35E-05       | 7.26E-03           | 2.14              | 12540    | 436      | 564      | 42       |
| GO:0004871     | signal transducer activity                                  | 4.37E-05       | 1.26E-02           | 1.93              | 12540    | 608      | 545      | 51       |
| GO:0004888     | transmembrane signaling receptor activity                   | 4.92E-05       | 1.33E-02           | 2.22              | 12540    | 378      | 537      | 36       |
| GO:0005201     | extracellular matrix structural constituent                 | 5.11E-05       | 1.30E-02           | 73.76             | 12540    | 17       | 30       | 3        |
| GO:0015175     | neutral amino acid transmembrane transporter activity       | 7.77E-05       | 1.86E-02           | 10.81             | 12540    | 20       | 348      | 6        |
| GO:0048248     | CXCR3 chemokine receptor binding                            | 8.53E-05       | 1.94E-02           | 28.31             | 12540    | 3        | 443      | 3        |
| GO:0019838     | growth factor binding                                       | 1.11E-04       | 2.39E-02           | 5.1               | 12540    | 92       | 294      | 11       |
| GO:0045236     | CXCR chemokine receptor binding                             | 1.21E-04       | 2.50E-02           | 12.01             | 12540    | 10       | 522      | 5        |
| GO:0001664     | G-protein coupled receptor binding                          | 1.44E-04       | 2.82E-02           | 3.02              | 12540    | 161      | 465      | 18       |
| GO:0022889     | serine transmembrane transporter activity                   | 2.91E-04       | 5.46E-02           | 27.26             | 12540    | 5        | 276      | 3        |
| GO:0015194     | L-serine transmembrane transporter activity                 | 2.91E-04       | 5.24E-02           | 27.26             | 12540    | 5        | 276      | 3        |
| GO:0031727     | CCR2 chemokine receptor binding                             | 4.33E-04       | 7.47E-02           | 90.87             | 12540    | 4        | 69       | 2        |
| GO:0004896     | cytokine receptor activity                                  | 4.81E-04       | 8.00E-02           | 8.84              | 12540    | 56       | 152      | 6        |
| GO:0070888     | E-box binding                                               | 5.47E-04       | 8.75E-02           | 5.86              | 12540    | 19       | 788      | 7        |
|                | RNA polymerase II core promoter proximal region             |                |                    |                   |          |          |          |          |
| GO:0000982     | sequence-specific DNA binding transcription factor activity | 7.29E-04       | 1.12E-01           | 1.89              | 12540    | 222      | 1074     | 36       |
| GO:0019770     | IgG receptor activity                                       | 7.98E-04       | 1.19E-01           | 15.05             | 12540    | 3        | 833      | 3        |
| GO:0016493     | C-C chemokine receptor activity                             | 8.43E-04       | 1.21E-01           | 21.41             | 12540    | 7        | 251      | 3        |

|            |                                                       |          |          |       |       |    |     |    |
|------------|-------------------------------------------------------|----------|----------|-------|-------|----|-----|----|
|            | RNA polymerase II core promoter sequence-specific DNA |          |          |       |       |    |     |    |
| GO:0000979 | binding                                               | 8.66E-04 | 1.21E-01 | 4.03  | 12540 | 39 | 797 | 10 |
| GO:0001730 | 2'-5'-oligoadenylate synthetase activity              | 9.42E-04 | 1.27E-01 | 18.17 | 12540 | 5  | 414 | 3  |

### Cellular component

| GO Term    | Description                            | p-value  | FDR q-value | Enrichment | N     | B    | n    | b   |
|------------|----------------------------------------|----------|-------------|------------|-------|------|------|-----|
| GO:0005615 | extracellular space                    | 1.35E-19 | 2.04E-16    | 2.72       | 12540 | 650  | 767  | 108 |
| GO:0005576 | extracellular region                   | 3.15E-18 | 2.37E-15    | 2.9        | 12540 | 761  | 523  | 92  |
| GO:0031012 | extracellular matrix                   | 4.64E-13 | 2.33E-10    | 5.55       | 12540 | 217  | 302  | 29  |
| GO:0044459 | plasma membrane part                   | 2.32E-11 | 8.76E-09    | 1.64       | 12540 | 1197 | 1194 | 187 |
| GO:0005578 | proteinaceous extracellular matrix     | 2.70E-11 | 8.14E-09    | 5.79       | 12540 | 172  | 302  | 24  |
| GO:0005886 | plasma membrane                        | 8.56E-10 | 2.15E-07    | 1.4        | 12540 | 2169 | 1261 | 305 |
| GO:0044421 | extracellular region part              | 1.48E-09 | 3.18E-07    | 1.47       | 12540 | 2472 | 785  | 228 |
| GO:0005581 | collagen trimer                        | 1.41E-08 | 2.65E-06    | 11.97      | 12540 | 45   | 256  | 11  |
| GO:0044425 | membrane part                          | 4.55E-08 | 7.62E-06    | 1.27       | 12540 | 3640 | 1132 | 417 |
| GO:0097458 | neuron part                            | 7.82E-08 | 1.18E-05    | 1.57       | 12540 | 963  | 1261 | 152 |
| GO:0031224 | intrinsic component of membrane        | 1.24E-07 | 1.70E-05    | 1.3        | 12540 | 2778 | 1248 | 359 |
| GO:0098552 | side of membrane                       | 2.85E-07 | 3.58E-05    | 2.44       | 12540 | 197  | 1097 | 42  |
| GO:0005583 | fibrillar collagen trimer              | 1.98E-06 | 2.30E-04    | 179.14     | 12540 | 7    | 30   | 3   |
| GO:0016021 | integral component of membrane         | 2.44E-06 | 2.62E-04    | 1.27       | 12540 | 2688 | 1248 | 341 |
| GO:0009897 | external side of plasma membrane       | 3.16E-06 | 3.17E-04    | 2.48       | 12540 | 157  | 1097 | 34  |
| GO:0044420 | extracellular matrix component         | 3.77E-06 | 3.55E-04    | 5.87       | 12540 | 92   | 302  | 13  |
| GO:0098589 | membrane region                        | 7.90E-06 | 7.00E-04    | 1.59       | 12540 | 677  | 1248 | 107 |
| GO:0005584 | collagen type I trimer                 | 1.11E-05 | 9.26E-04    | 418        | 12540 | 2    | 30   | 2   |
| GO:0016020 | membrane                               | 1.43E-05 | 1.14E-03    | 1.16       | 12540 | 5347 | 1152 | 570 |
| GO:0031226 | intrinsic component of plasma membrane | 1.83E-05 | 1.38E-03    | 1.98       | 12540 | 400  | 808  | 51  |
| GO:0030426 | growth cone                            | 3.29E-05 | 2.36E-03    | 4.86       | 12540 | 114  | 294  | 13  |
| GO:0030427 | site of polarized growth               | 4.66E-05 | 3.20E-03    | 4.74       | 12540 | 117  | 294  | 13  |
| GO:0043005 | neuron projection                      | 4.72E-05 | 3.10E-03    | 1.58       | 12540 | 668  | 1103 | 93  |
| GO:0045121 | membrane raft                          | 5.97E-05 | 3.75E-03    | 1.97       | 12540 | 219  | 1248 | 43  |
| GO:0005887 | integral component of plasma membrane  | 6.92E-05 | 4.17E-03    | 1.96       | 12540 | 365  | 808  | 46  |
| GO:0042995 | cell projection                        | 1.44E-04 | 8.34E-03    | 1.38       | 12540 | 1191 | 1217 | 159 |
| GO:0044217 | other organism part                    | 3.15E-04 | 1.76E-02    | 6.24       | 12540 | 17   | 827  | 7   |

|            |                                      |          |          |          |       |     |      |    |
|------------|--------------------------------------|----------|----------|----------|-------|-----|------|----|
| GO:1990777 | lipoprotein particle                 | 3.36E-04 | 1.81E-02 | 38.82    | 12540 | 19  | 51   | 3  |
| GO:0034358 | plasma lipoprotein particle          | 3.36E-04 | 1.75E-02 | 38.82    | 12540 | 19  | 51   | 3  |
| GO:0030425 | dendrite                             | 3.49E-04 | 1.75E-02 | 1.98     | 12540 | 278 | 845  | 37 |
| GO:0031225 | anchored component of membrane       | 3.73E-04 | 1.81E-02 | 3.5      | 12540 | 83  | 604  | 14 |
| GO:0030424 | axon                                 | 4.47E-04 | 2.10E-02 | 1.89     | 12540 | 239 | 1082 | 39 |
| GO:0032994 | protein-lipid complex                | 4.86E-04 | 2.22E-02 | 35.13    | 12540 | 21  | 51   | 3  |
| GO:0005586 | collagen type III trimer             | 5.58E-04 | 2.47E-02 | 1 791.43 | 12540 | 1   | 7    | 1  |
| GO:0072562 | blood microparticle                  | 5.81E-04 | 2.50E-02 | 3.5      | 12540 | 65  | 717  | 13 |
| GO:0009986 | cell surface                         | 6.01E-04 | 2.51E-02 | 1.63     | 12540 | 369 | 1248 | 60 |
| GO:0020005 | symbiont-containing vacuole membrane | 7.28E-04 | 2.97E-02 | 10.11    | 12540 | 6   | 827  | 4  |
| GO:0033267 | axon part                            | 7.50E-04 | 2.98E-02 | 3.53     | 12540 | 176 | 242  | 12 |
| GO:0033643 | host cell part                       | 9.12E-04 | 3.52E-02 | 7.58     | 12540 | 10  | 827  | 5  |
