# Supplementary material for: Gene-Expression Profiling Suggests Impaired Signaling via the Interferon Pathway in Cstb-/- Microglia
Source: PubMed Central journal article supplement (PMC4927094; doi:10.1371/journal.pone.0158195), 2016-06-29
Supplement: pone.0158195.s009.pdf [file pone.0158195.s009.pdf]

**Supplementary table 6: Pathways enriched in differentially expressed genes in *Cstb*<sup>-/-</sup> microglia.**

| <b>Pathways identified in microarray approach</b>                                        | <b>-log(p-value)</b> |
|------------------------------------------------------------------------------------------|----------------------|
| Activation of IRF by Cytosolic Pattern Recognition Receptors                             | 1.25E+01             |
| Interferon Signaling                                                                     | 1.04E+01             |
| Role of Pattern Recognition Receptors in Recognition of Bacteria and Viruses             | 8.02E+00             |
| Role of RIG1-like Receptors in Antiviral Innate Immunity                                 | 6.38E+00             |
| Antigen Presentation Pathway                                                             | 5.42E+00             |
| Role of PKR in Interferon Induction and Antiviral Response                               | 5.25E+00             |
| Type I Diabetes Mellitus Signaling                                                       | 5.15E+00             |
| Communication between Innate and Adaptive Immune Cells                                   | 4.57E+00             |
| Retinoic acid Mediated Apoptosis Signaling                                               | 4.24E+00             |
| Dendritic Cell Maturation                                                                | 3.79E+00             |
| Graft-versus-Host Disease Signaling                                                      | 3.59E+00             |
| Regulation of Cytokine Production in Intestinal Epithelial Cells by IL-17A and IL-17F    | 3.38E+00             |
| LXR/RXR Activation                                                                       | 2.95E+00             |
| Pathogenesis of Multiple Sclerosis                                                       | 2.84E+00             |
| Allograft Rejection Signaling                                                            | 2.64E+00             |
| UVA-Induced MAPK Signaling                                                               | 2.60E+00             |
| iNOS Signaling                                                                           | 2.55E+00             |
| Death Receptor Signaling                                                                 | 2.53E+00             |
| Role of Hypercytokinemia/hyperchemokineemia in the Pathogenesis of Influenza             | 2.52E+00             |
| Systemic Lupus Erythematosus Signaling                                                   | 2.52E+00             |
| Autoimmune Thyroid Disease Signaling                                                     | 2.41E+00             |
| CDP-diacylglycerol Biosynthesis I                                                        | 2.33E+00             |
| B Cell Receptor Signaling                                                                | 2.25E+00             |
| Regulation of Cytokine Production in Macrophages and T Helper Cells by IL-17A and IL-17F | 2.23E+00             |
| Phosphatidylglycerol Biosynthesis II (Non-plastidic)                                     | 2.23E+00             |
| Role of JAK1, JAK2 and TYK2 in Interferon Signaling                                      | 1.99E+00             |
| IL-17A Signaling in Gastric Cells                                                        | 1.95E+00             |
| IL-12 Signaling and Production in Macrophages                                            | 1.95E+00             |
| Toll-like Receptor Signaling                                                             | 1.93E+00             |
| TREM1 Signaling                                                                          | 1.92E+00             |
| FLT3 Signaling in Hematopoietic Progenitor Cells                                         | 1.92E+00             |
| IL-15 Production                                                                         | 1.89E+00             |
| VDR/RXR Activation                                                                       | 1.86E+00             |
| TNFR2 Signaling                                                                          | 1.83E+00             |
| Crosstalk between Dendritic Cells and Natural Killer Cells                               | 1.70E+00             |
| OX40 Signaling Pathway                                                                   | 1.70E+00             |
| IL-17A Signaling in Fibroblasts                                                          | 1.67E+00             |
| Salvage Pathways of Pyrimidine Ribonucleotides                                           | 1.65E+00             |
| Acute Phase Response Signaling                                                           | 1.62E+00             |
| Role of NFAT in Regulation of the Immune Response                                        | 1.61E+00             |
| NF- $\kappa$ B Signaling                                                                 | 1.59E+00             |
| Thyroid Cancer Signaling                                                                 | 1.56E+00             |

|                                                                                |          |
|--------------------------------------------------------------------------------|----------|
| Neuroprotective Role of THOP1 in Alzheimer's Disease                           | 1.56E+00 |
| Granulocyte Adhesion and Diapedesis                                            | 1.56E+00 |
| PPARa/RXRa Activation                                                          | 1.54E+00 |
| Production of Nitric Oxide and Reactive Oxygen Species in Macrophages          | 1.54E+00 |
| Role of IL-17F in Allergic Inflammatory Airway Diseases                        | 1.49E+00 |
| Glucocorticoid Receptor Signaling                                              | 1.49E+00 |
| NAD Biosynthesis III                                                           | 1.42E+00 |
| TNFR1 Signaling                                                                | 1.40E+00 |
| PKd Signaling in T Lymphocytes                                                 | 1.39E+00 |
| phagosome maturation                                                           | 1.37E+00 |
| CD27 Signaling in Lymphocytes                                                  | 1.35E+00 |
| Primary Immunodeficiency Signaling                                             | 1.35E+00 |
| PI3K/AKT Signaling                                                             | 1.35E+00 |
| Thrombopoietin Signaling                                                       | 1.31E+00 |
| PI3K Signaling in B Lymphocytes                                                | 1.30E+00 |
| Role of JAK1 and JAK3 in gc Cytokine Signaling                                 | 1.21E+00 |
| Pyridoxal 5'-phosphate Salvage Pathway                                         | 1.19E+00 |
| CD40 Signaling                                                                 | 1.18E+00 |
| IL-10 Signaling                                                                | 1.15E+00 |
| Role of MAPK Signaling in the Pathogenesis of Influenza                        | 1.14E+00 |
| IL-3 Signaling                                                                 | 1.12E+00 |
| T Helper Cell Differentiation                                                  | 1.12E+00 |
| Small Cell Lung Cancer Signaling                                               | 1.12E+00 |
| JAK/Stat Signaling                                                             | 1.10E+00 |
| NF-kB Activation by Viruses                                                    | 1.09E+00 |
| Prolactin Signaling                                                            | 1.09E+00 |
| NAD Phosphorylation and Dephosphorylation                                      | 1.09E+00 |
| Protein Ubiquitination Pathway                                                 | 1.08E+00 |
| G-Protein Coupled Receptor Signaling                                           | 1.08E+00 |
| PDGF Signaling                                                                 | 1.06E+00 |
| Cdc42 Signaling                                                                | 1.03E+00 |
| CTLA4 Signaling in Cytotoxic T Lymphocytes                                     | 9.58E-01 |
| Altered T Cell and B Cell Signaling in Rheumatoid Arthritis                    | 9.58E-01 |
| RANK Signaling in Osteoclasts                                                  | 9.58E-01 |
| Hepatic Fibrosis / Hepatic Stellate Cell Activation                            | 9.42E-01 |
| Fcg Receptor-mediated Phagocytosis in Macrophages and Monocytes                | 9.18E-01 |
| Chronic Myeloid Leukemia Signaling                                             | 9.18E-01 |
| Agranulocyte Adhesion and Diapedesis                                           | 9.11E-01 |
| PPAR Signaling                                                                 | 9.11E-01 |
| Role of Macrophages, Fibroblasts and Endothelial Cells in Rheumatoid Arthritis | 8.98E-01 |
| Pyrimidine Deoxyribonucleotides De Novo Biosynthesis I                         | 8.78E-01 |
| IL-22 Signaling                                                                | 8.43E-01 |
| Role of Lipids/Lipid Rafts in the Pathogenesis of Influenza                    | 8.26E-01 |
| Role of JAK family kinases in IL-6-type Cytokine Signaling                     | 8.26E-01 |
| NGF Signaling                                                                  | 8.20E-01 |
| iCOS-iCOSL Signaling in T Helper Cells                                         | 8.14E-01 |
| NAD Salvage Pathway II                                                         | 8.11E-01 |

|                                                                   |          |
|-------------------------------------------------------------------|----------|
| Renin-Angiotensin Signaling                                       | 8.08E-01 |
| LPS/IL-1 Mediated Inhibition of RXR Function                      | 7.76E-01 |
| Pyrimidine Ribonucleotides Interconversion                        | 7.67E-01 |
| IL-6 Signaling                                                    | 7.66E-01 |
| p38 MAPK Signaling                                                | 7.60E-01 |
| CD28 Signaling in T Helper Cells                                  | 7.54E-01 |
| 4-1BB Signaling in T Lymphocytes                                  | 7.41E-01 |
| Pyrimidine Ribonucleotides De Novo Biosynthesis                   | 7.41E-01 |
| Cytotoxic T Lymphocyte-mediated Apoptosis of Target Cells         | 7.29E-01 |
| FXR/RXR Activation                                                | 7.05E-01 |
| IL-9 Signaling                                                    | 7.05E-01 |
| Oncostatin M Signaling                                            | 7.05E-01 |
| B Cell Development                                                | 7.05E-01 |
| TWEAK Signaling                                                   | 7.05E-01 |
| Inhibition of Angiogenesis by TSP1                                | 7.05E-01 |
| Role of JAK2 in Hormone-like Cytokine Signaling                   | 6.94E-01 |
| Triacylglycerol Biosynthesis                                      | 6.94E-01 |
| Complement System                                                 | 6.72E-01 |
| April Mediated Signaling                                          | 6.62E-01 |
| Docosahexaenoic Acid (DHA) Signaling                              | 6.52E-01 |
| Aryl Hydrocarbon Receptor Signaling                               | 6.43E-01 |
| B Cell Activating Factor Signaling                                | 6.42E-01 |
| FcγRIIB Signaling in B Lymphocytes                                | 6.33E-01 |
| Mechanisms of Viral Exit from Host Cells                          | 6.33E-01 |
| Tec Kinase Signaling                                              | 5.68E-01 |
| Hepatic Cholestasis                                               | 5.53E-01 |
| CNTF Signaling                                                    | 5.44E-01 |
| Semaphorin Signaling in Neurons                                   | 5.37E-01 |
| Lymphotoxin b Receptor Signaling                                  | 5.31E-01 |
| Role of IL-17A in Arthritis                                       | 5.31E-01 |
| Role of Cytokines in Mediating Communication between Immune Cells | 5.17E-01 |
| EGF Signaling                                                     | 5.17E-01 |
| Nur77 Signaling in T Lymphocytes                                  | 5.11E-01 |
| Induction of Apoptosis by HIV1                                    | 4.93E-01 |
| GM-CSF Signaling                                                  | 4.81E-01 |
| IL-8 Signaling                                                    | 4.79E-01 |
| ERK5 Signaling                                                    | 4.75E-01 |
| PCP pathway                                                       | 4.75E-01 |
| IL-17A Signaling in Airway Cells                                  | 4.70E-01 |
| Eicosanoid Signaling                                              | 4.70E-01 |
| Non-Small Cell Lung Cancer Signaling                              | 4.64E-01 |
| Hypoxia Signaling in the Cardiovascular System                    | 4.64E-01 |
| RAR Activation                                                    | 4.61E-01 |
| Angiopoietin Signaling                                            | 4.59E-01 |
| Role of PI3K/AKT Signaling in the Pathogenesis of Influenza       | 4.59E-01 |
| CCR5 Signaling in Macrophages                                     | 4.44E-01 |
| Growth Hormone Signaling                                          | 4.44E-01 |

|                                                                           |          |
|---------------------------------------------------------------------------|----------|
| Caveolar-mediated Endocytosis Signaling                                   | 4.34E-01 |
| PEDF Signaling                                                            | 4.34E-01 |
| Chemokine Signaling                                                       | 4.34E-01 |
| IL-17 Signaling                                                           | 4.29E-01 |
| LPS-stimulated MAPK Signaling                                             | 4.24E-01 |
| Role of BRCA1 in DNA Damage Response                                      | 4.02E-01 |
| Acute Myeloid Leukemia Signaling                                          | 3.98E-01 |
| Regulation of IL-2 Expression in Activated and Anergic T Lymphocytes      | 3.98E-01 |
| Role of Osteoblasts, Osteoclasts and Chondrocytes in Rheumatoid Arthritis | 3.84E-01 |
| cAMP-mediated signaling                                                   | 3.84E-01 |
| TR/RXR Activation                                                         | 3.74E-01 |
| TGF- $\beta$ Signaling                                                    | 3.66E-01 |
| Virus Entry via Endocytic Pathways                                        | 3.59E-01 |
| Apoptosis Signaling                                                       | 3.59E-01 |
| IL-1 Signaling                                                            | 3.52E-01 |
| Colorectal Cancer Metastasis Signaling                                    | 3.47E-01 |
| T Cell Receptor Signaling                                                 | 3.31E-01 |
| p53 Signaling                                                             | 3.28E-01 |
| Antioxidant Action of Vitamin C                                           | 3.25E-01 |
| Cholecystokinin/Gastrin-mediated Signaling                                | 3.19E-01 |
| HGF Signaling                                                             | 3.07E-01 |
| Pancreatic Adenocarcinoma Signaling                                       | 3.04E-01 |
| Sphingosine-1-phosphate Signaling                                         | 2.96E-01 |
| Gas Signaling                                                             | 2.96E-01 |
| Role of Tissue Factor in Cancer                                           | 2.93E-01 |
| phagosome formation                                                       | 2.90E-01 |
| Xenobiotic Metabolism Signaling                                           | 2.82E-01 |
| Type II Diabetes Mellitus Signaling                                       | 2.75E-01 |
| Ga12/13 Signaling                                                         | 2.75E-01 |
| PTEN Signaling                                                            | 2.72E-01 |
| HMGB1 Signaling                                                           | 2.67E-01 |
| Gai Signaling                                                             | 2.67E-01 |
| Gustation Pathway                                                         | 2.65E-01 |
| Atherosclerosis Signaling                                                 | 2.58E-01 |
| GNRH Signaling                                                            | 2.47E-01 |
| Gaq Signaling                                                             | 2.12E-01 |

**Pathways identified in RNA-seq approach**

|                                                                               | <b><math>-\log(p\text{-value})</math></b> |
|-------------------------------------------------------------------------------|-------------------------------------------|
| Activation of IRF by Cytosolic Pattern Recognition Receptors                  | 7.54E+00                                  |
| Interferon Signaling                                                          | 5.57E+00                                  |
| Role of Pattern Recognition Receptors in Recognition of Bacteria and Viruses  | 4.49E+00                                  |
| Pathogenesis of Multiple Sclerosis                                            | 3.54E+00                                  |
| UVA-Induced MAPK Signaling                                                    | 2.68E+00                                  |
| Communication between Innate and Adaptive Immune Cells                        | 2.64E+00                                  |
| Role of RIG1-like Receptors in Antiviral Innate Immunity                      | 2.13E+00                                  |
| Role of Hypercytokinemia/hyperchemokinememia in the Pathogenesis of Influenza | 2.13E+00                                  |

|                                                                                          |          |
|------------------------------------------------------------------------------------------|----------|
| Granulocyte Adhesion and Diapedesis                                                      | 1.84E+00 |
| Retinoic acid Mediated Apoptosis Signaling                                               | 1.83E+00 |
| Agranulocyte Adhesion and Diapedesis                                                     | 1.77E+00 |
| Allograft Rejection Signaling                                                            | 1.59E+00 |
| Crosstalk between Dendritic Cells and Natural Killer Cells                               | 1.57E+00 |
| OX40 Signaling Pathway                                                                   | 1.57E+00 |
| Death Receptor Signaling                                                                 | 1.54E+00 |
| Bile Acid Biosynthesis, Neutral Pathway                                                  | 1.43E+00 |
| Renin-Angiotensin Signaling                                                              | 1.41E+00 |
| Type I Diabetes Mellitus Signaling                                                       | 1.40E+00 |
| Regulation of Cytokine Production in Macrophages and T Helper Cells by IL-17A and IL-17F | 1.30E+00 |
| Regulation of Cytokine Production in Intestinal Epithelial Cells by IL-17A and IL-17F    | 1.19E+00 |
| IL-22 Signaling                                                                          | 1.17E+00 |
| Role of JAK1, JAK2 and TYK2 in Interferon Signaling                                      | 1.17E+00 |
| Dopamine Degradation                                                                     | 1.17E+00 |
| Role of Lipids/Lipid Rafts in the Pathogenesis of Influenza                              | 1.16E+00 |
| IL-17A Signaling in Gastric Cells                                                        | 1.16E+00 |
| Role of JAK family kinases in IL-6-type Cytokine Signaling                               | 1.16E+00 |
| IL-15 Production                                                                         | 1.13E+00 |
| Cdc42 Signaling                                                                          | 1.08E+00 |
| IL-9 Signaling                                                                           | 1.03E+00 |
| Oncostatin M Signaling                                                                   | 1.03E+00 |
| Dendritic Cell Maturation                                                                | 1.03E+00 |
| Role of JAK2 in Hormone-like Cytokine Signaling                                          | 1.02E+00 |
| Thyroid Hormone Metabolism II (via Conjugation and/or Degradation)                       | 1.02E+00 |
| Hepatic Fibrosis / Hepatic Stellate Cell Activation                                      | 1.01E+00 |
| Antigen Presentation Pathway                                                             | 9.95E-01 |
| Role of PKR in Interferon Induction and Antiviral Response                               | 9.63E-01 |
| Neuroprotective Role of THOP1 in Alzheimer's Disease                                     | 9.63E-01 |
| iNOS Signaling                                                                           | 9.24E-01 |
| Graft-versus-Host Disease Signaling                                                      | 8.88E-01 |
| Autoimmune Thyroid Disease Signaling                                                     | 8.80E-01 |
| CNTF Signaling                                                                           | 8.56E-01 |
| Role of IL-17A in Arthritis                                                              | 8.41E-01 |
| Thrombopoietin Signaling                                                                 | 8.34E-01 |
| EGF Signaling                                                                            | 8.26E-01 |
| Melatonin Degradation I                                                                  | 8.19E-01 |
| Superpathway of Melatonin Degradation                                                    | 7.86E-01 |
| GM-CSF Signaling                                                                         | 7.86E-01 |
| Role of JAK1 and JAK3 in gc Cytokine Signaling                                           | 7.79E-01 |
| Protein Ubiquitination Pathway                                                           | 7.78E-01 |
| Serotonin Degradation                                                                    | 7.73E-01 |
| Hypoxia Signaling in the Cardiovascular System                                           | 7.67E-01 |
| Role of PI3K/AKT Signaling in the Pathogenesis of Influenza                              | 7.61E-01 |
| IL-10 Signaling                                                                          | 7.49E-01 |
| CCR5 Signaling in Macrophages                                                            | 7.43E-01 |
| Growth Hormone Signaling                                                                 | 7.43E-01 |

|                                                                                |          |
|--------------------------------------------------------------------------------|----------|
| Role of MAPK Signaling in the Pathogenesis of Influenza                        | 7.43E-01 |
| IL-3 Signaling                                                                 | 7.32E-01 |
| T Helper Cell Differentiation                                                  | 7.32E-01 |
| Chemokine Signaling                                                            | 7.32E-01 |
| Glucocorticoid Receptor Signaling                                              | 7.27E-01 |
| JAK/Stat Signaling                                                             | 7.27E-01 |
| Prolactin Signaling                                                            | 7.21E-01 |
| TREM1 Signaling                                                                | 7.16E-01 |
| FLT3 Signaling in Hematopoietic Progenitor Cells                               | 7.16E-01 |
| PDGF Signaling                                                                 | 7.01E-01 |
| VDR/RXR Activation                                                             | 6.96E-01 |
| Role of BRCA1 in DNA Damage Response                                           | 6.96E-01 |
| TGF- $\beta$ Signaling                                                         | 6.53E-01 |
| Altered T Cell and B Cell Signaling in Rheumatoid Arthritis                    | 6.49E-01 |
| T Cell Receptor Signaling                                                      | 6.12E-01 |
| Pancreatic Adenocarcinoma Signaling                                            | 5.79E-01 |
| p38 MAPK Signaling                                                             | 5.42E-01 |
| Gustation Pathway                                                              | 5.30E-01 |
| FXR/RXR Activation                                                             | 5.13E-01 |
| D-myo-inositol (1,4,5,6)-Tetrakisphosphate Biosynthesis                        | 5.04E-01 |
| D-myo-inositol (3,4,5,6)-tetrakisphosphate Biosynthesis                        | 5.04E-01 |
| IL-12 Signaling and Production in Macrophages                                  | 4.91E-01 |
| D-myo-inositol-5-phosphate Metabolism                                          | 4.63E-01 |
| 3-phosphoinositide Degradation                                                 | 4.61E-01 |
| 3-phosphoinositide Biosynthesis                                                | 4.36E-01 |
| Tec Kinase Signaling                                                           | 4.36E-01 |
| Hepatic Cholestasis                                                            | 4.27E-01 |
| Acute Phase Response Signaling                                                 | 4.13E-01 |
| Production of Nitric Oxide and Reactive Oxygen Species in Macrophages          | 3.92E-01 |
| IL-8 Signaling                                                                 | 3.84E-01 |
| ERK/MAPK Signaling                                                             | 3.79E-01 |
| Superpathway of Inositol Phosphate Compounds                                   | 3.65E-01 |
| Systemic Lupus Erythematosus Signaling                                         | 3.27E-01 |
| Colorectal Cancer Metastasis Signaling                                         | 3.05E-01 |
| Role of Macrophages, Fibroblasts and Endothelial Cells in Rheumatoid Arthritis | 2.37E-01 |
