# Supplementary material for: Gene-Expression Profiling Suggests Impaired Signaling via the Interferon Pathway in Cstb-/- Microglia
Source: PubMed Central journal article supplement (PMC4927094; doi:10.1371/journal.pone.0158195), 2016-06-29
Supplement: pone.0158195.s010.pdf [file pone.0158195.s010.pdf]

**Supplementary table 7: Regulators enriched in differentially expressed genes in *Cstb*<sup>-/-</sup> microglia.**

| <b>Upstream regulator identified in microarray approach</b> | <b>Activation z-score</b> | <b>p-value of overlap</b> |
|-------------------------------------------------------------|---------------------------|---------------------------|
| TRIM24                                                      | 5.9                       | 1.20E-56                  |
| Ifnar                                                       | -5.3                      | 6.50E-53                  |
| IRF7                                                        | -5.5                      | 4.49E-52                  |
| IRF3                                                        | -5.4                      | 7.07E-52                  |
| STAT1                                                       | -5.2                      | 2.51E-36                  |
| ACKR2                                                       | 4.5                       | 1.05E-35                  |
| IFNB1                                                       | -4.3                      | 2.24E-34                  |
| IFNG                                                        | -5.7                      | 4.37E-33                  |
| IFNL1                                                       | -4.6                      | 2.40E-32                  |
| IFNA2                                                       | -4.7                      | 3.20E-32                  |
| IFNAR1                                                      | -3.4                      | 2.50E-31                  |
| MAVS                                                        | -4.2                      | 6.63E-29                  |
| IRF5                                                        | -4.0                      | 4.10E-28                  |
| PRL                                                         | -4.8                      | 1.12E-27                  |
| DDX58                                                       | -3.5                      | 4.98E-27                  |
| TICAM1                                                      | -4.5                      | 1.89E-26                  |
| MAPK1                                                       | 5.2                       | 5.21E-26                  |
| TLR3                                                        | -3.9                      | 7.70E-25                  |
| SOCS1                                                       | 3.9                       | 3.70E-23                  |
| PTGER4                                                      | 4.4                       | 1.32E-22                  |
| FADD                                                        | -3.0                      | 1.87E-21                  |
| DNASE2                                                      | 2.6                       | 2.04E-21                  |
| IL1RN                                                       | 4.0                       | 6.73E-20                  |
| TLR4                                                        | -3.5                      | 7.69E-20                  |
| SASH1                                                       | -3.9                      | 1.29E-19                  |
| TGM2                                                        | -4.6                      | 1.73E-19                  |
| IFNLR1                                                      |                           | 2.88E-19                  |
| SAMSN1                                                      | -3.9                      | 4.10E-18                  |
| TLR9                                                        | -4.1                      | 5.31E-18                  |
| MYD88                                                       | -3.9                      | 7.00E-18                  |
| Interferon alpha                                            | -4.1                      | 2.30E-17                  |
| NFATC2                                                      | -3.7                      | 4.90E-17                  |
| IL10RA                                                      | 4.6                       | 6.25E-17                  |
| FZD9                                                        | -3.0                      | 1.66E-16                  |
| STAT2                                                       | -1.6                      | 5.92E-16                  |
| IFN alpha/beta                                              | -3.4                      | 1.05E-15                  |
| mir-21                                                      | 3.9                       | 1.77E-15                  |
| STAT3                                                       | -2.1                      | 5.72E-15                  |
| DOCK8                                                       | -3.5                      | 7.89E-15                  |
| EIF2AK2                                                     | -3.4                      | 1.92E-14                  |
| TNF                                                         | -5.0                      | 2.89E-14                  |
| STAT4                                                       | -1.4                      | 3.19E-14                  |

|                |      |          |
|----------------|------|----------|
| Irgm1          | 3.2  | 6.42E-14 |
| CNOT7          |      | 1.28E-13 |
| Ifna           | -2.6 | 3.75E-13 |
| IKBKE          | -1.4 | 5.85E-13 |
| TCR            |      | 1.16E-12 |
| TRIM21         | 2.4  | 1.78E-11 |
| IFNA1/IFNA13   | -2.4 | 1.78E-11 |
| IL12 (complex) | -1.1 | 1.97E-11 |
| IL6            | -2.6 | 2.69E-11 |
| RELA           | -2.9 | 3.77E-11 |
| IKBKG          | -2.6 | 1.01E-10 |
| SOCS3          | 1.9  | 2.28E-10 |
| IFIH1          | -2.0 | 2.40E-10 |
| IL12B          | -2.8 | 3.29E-10 |
| TBK1           | -1.6 | 3.88E-10 |
| IRF4           | 1.3  | 6.42E-10 |
| IL27           | -2.2 | 6.42E-10 |
| Nr1h           | 1.1  | 2.43E-09 |
| NCOA2          | -1.3 | 3.56E-09 |
| IL12A          | -2.4 | 3.56E-09 |
| PLK4           | -1.6 | 6.39E-09 |
| IRF9           |      | 6.39E-09 |
| PLK2           | -1.6 | 8.26E-09 |
| IRAK4          | -1.4 | 9.87E-09 |
| PAF1           | -2.6 | 1.16E-08 |
| NFkB (complex) | -3.6 | 1.17E-08 |
| KDM6B          |      | 1.32E-08 |
| JAK1           | -2.4 | 1.34E-08 |
| STAT6          | 1.3  | 1.63E-08 |
| BAK1           | -2.4 | 1.68E-08 |
| NLRC5          | -1.6 | 1.98E-08 |
| TREM1          | -0.6 | 2.26E-08 |
| GAPDH          | 2.4  | 3.16E-08 |
| TNK1           | -2.2 | 4.03E-08 |
| Map3k7         | -1.6 | 5.26E-08 |
| USP18          | 2.2  | 5.56E-08 |
| IFNAR2         |      | 7.51E-08 |
| MAPKAP1        | -2.0 | 8.22E-08 |
| CHUK           | -3.0 | 1.04E-07 |
| CD40           | -2.4 | 1.18E-07 |
| NR1H2          | 0.5  | 1.45E-07 |
| WHSC1          | -2.0 | 1.47E-07 |
| IRF2           | 0.3  | 1.50E-07 |
| TAB1           | 2.2  | 2.13E-07 |
| IgG            | -0.1 | 2.31E-07 |
| BAX            | -2.4 | 3.05E-07 |
| RARA           | 0.3  | 3.42E-07 |

|                   |      |          |
|-------------------|------|----------|
| IKBKB             | -3.1 | 3.92E-07 |
| SLC9A3            |      | 5.02E-07 |
| STAR              | 2.0  | 5.71E-07 |
| IFNA4             | -2.0 | 5.71E-07 |
| TLR7              | -2.6 | 6.96E-07 |
| RPSA              | 2.2  | 7.31E-07 |
| UBA7              |      | 8.19E-07 |
| IFN type 1        | -2.0 | 8.20E-07 |
| LDL               | -2.0 | 1.38E-06 |
| IRF1              | -2.2 | 1.39E-06 |
| MAP3K7            | 2.0  | 1.43E-06 |
| IFNGR1            |      | 1.94E-06 |
| ISGF3             |      | 2.04E-06 |
| CREBBP            |      | 2.07E-06 |
| NR3C1             | 2.6  | 2.20E-06 |
| NFKB1             | -2.2 | 2.43E-06 |
| MSR1              |      | 2.68E-06 |
| PARP1             | -2.4 | 2.68E-06 |
| CD40LG            | -2.2 | 3.16E-06 |
| IL4               | 0.8  | 3.31E-06 |
| ISG15             |      | 4.06E-06 |
| VIPR1             |      | 4.06E-06 |
| SOX11             | 0.9  | 4.48E-06 |
| NLRX1             |      | 7.07E-06 |
| PLAU              | -2.2 | 7.78E-06 |
| NOS2              | -2.1 | 9.04E-06 |
| RNA polymerase II |      | 9.62E-06 |
| CCL5              | -2.2 | 9.63E-06 |
| S100A8            | 1.2  | 9.70E-06 |
| ERK1/2            | 0.7  | 9.83E-06 |
| GAB1              |      | 1.68E-05 |
| IL17D             |      | 1.68E-05 |
| C3AR1             | 0.9  | 1.89E-05 |
| Histone h4        |      | 2.37E-05 |
| TNFRSF1A          | -1.8 | 2.51E-05 |
| TGFB1             | 0.7  | 2.70E-05 |
| LECT2             |      | 3.28E-05 |
| Iga               |      | 3.28E-05 |
| CCL3L3            |      | 3.28E-05 |
| COLEC12           |      | 3.51E-05 |
| SCARA5            |      | 3.51E-05 |
| SCARA3            |      | 3.51E-05 |
| MAP2K3            | -2.0 | 3.78E-05 |
| EBI3              | -2.0 | 3.78E-05 |
| TMEM173           | -2.0 | 3.78E-05 |
| NFKBIA            | -1.0 | 4.28E-05 |
| SATB1             | 0.1  | 4.37E-05 |

|               |      |          |
|---------------|------|----------|
| NR1H3         | 0.0  | 5.33E-05 |
| IRF8          | -2.0 | 5.72E-05 |
| IL1B          | -3.1 | 5.78E-05 |
| ABCA1         |      | 6.08E-05 |
| Alpha catenin | 2.4  | 7.21E-05 |
| CSF2          | -2.1 | 7.45E-05 |
| CDKN2A        | -2.0 | 8.30E-05 |
| IL33          | -2.0 | 8.37E-05 |
| CD3           | 2.6  | 8.37E-05 |
| S100A9        |      | 8.88E-05 |
| CFTR          | 1.1  | 9.09E-05 |

| <b>Upstream regulator identified in RNA-seq approach</b> | <b>Activation z-score</b> | <b>p-value of overlap</b> |
|----------------------------------------------------------|---------------------------|---------------------------|
| IRF3                                                     | -4.8                      | 2.44E-42                  |
| Ifnar                                                    | -4.3                      | 4.69E-42                  |
| IRF7                                                     | -4.5                      | 3.66E-38                  |
| ACKR2                                                    | 4.1                       | 1.46E-35                  |
| TRIM24                                                   | 4.3                       | 1.60E-31                  |
| PTGER4                                                   | 4.0                       | 1.54E-30                  |
| IFNA2                                                    | -4.1                      | 2.41E-30                  |
| IFNB1                                                    | -3.5                      | 2.58E-30                  |
| IFNL1                                                    | -4.0                      | 6.89E-29                  |
| MAVS                                                     | -3.8                      | 1.23E-28                  |
| TLR3                                                     | -2.8                      | 4.55E-27                  |
| DDX58                                                    | -3.1                      | 2.01E-26                  |
| IFNAR1                                                   | -3.1                      | 2.64E-26                  |
| STAT1                                                    | -4.1                      | 1.02E-25                  |
| SOCS1                                                    | 3.7                       | 5.88E-24                  |
| DNASE2                                                   | 2.2                       | 6.52E-24                  |
| TICAM1                                                   | -3.4                      | 2.55E-23                  |
| MAPK1                                                    | 4.2                       | 5.96E-23                  |
| FZD9                                                     | -2.4                      | 1.25E-22                  |
| IRF5                                                     | -3.4                      | 1.59E-22                  |
| IFNG                                                     | -4.1                      | 3.02E-21                  |
| Interferon alpha                                         | -3.8                      | 2.62E-20                  |
| TLR9                                                     | -3.2                      | 4.32E-19                  |
| STAT2                                                    | -1.5                      | 6.85E-18                  |
| Irgm1                                                    | 3.2                       | 1.17E-17                  |
| TLR4                                                     | -2.3                      | 5.67E-17                  |
| IKBKE                                                    | -1.4                      | 2.62E-16                  |
| IL1RN                                                    | 3.3                       | 2.98E-16                  |
| IFNLR1                                                   |                           | 1.94E-15                  |
| SASH1                                                    | -3.2                      | 2.66E-15                  |
| EIF2AK2                                                  | -3.1                      | 4.11E-15                  |
| TCR                                                      |                           | 4.13E-15                  |
| SAMSN1                                                   | -3.2                      | 2.51E-14                  |

|                |      |          |
|----------------|------|----------|
| PRL            | -3.5 | 1.13E-13 |
| NFATC2         | -3.2 | 1.28E-13 |
| DOCK8          | -3.0 | 1.48E-13 |
| TBK1           | -1.5 | 1.93E-13 |
| Ifna           | -2.4 | 4.08E-13 |
| IKBKG          | -2.1 | 4.30E-13 |
| TNK1           | -2.4 | 2.92E-12 |
| MYD88          | -2.3 | 3.03E-12 |
| NCOA2          | -2.4 | 9.85E-12 |
| PAF1           | -2.6 | 3.28E-11 |
| IFNA4          | -2.2 | 7.88E-11 |
| IFIH1          | -1.8 | 8.69E-11 |
| IFN type 1     | -0.2 | 1.28E-10 |
| TNF            | -2.0 | 1.43E-10 |
| Map3k7         | -1.8 | 1.53E-10 |
| CNOT7          |      | 1.69E-10 |
| IFN alpha/beta | -2.6 | 1.74E-10 |
| IL10RA         | 2.7  | 2.38E-10 |
| TGM2           | -3.1 | 2.67E-10 |
| FADD           | -2.6 | 5.96E-10 |
| IFNAR2         |      | 1.14E-09 |
| STAT6          | 1.9  | 1.30E-09 |
| SOCS3          | 1.7  | 1.81E-09 |
| CHUK           | -2.1 | 1.98E-09 |
| IKBKB          | -1.6 | 2.68E-09 |
| STAT3          | -1.7 | 2.73E-09 |
| MAPKAP1        | -2.0 | 2.88E-09 |
| TAB1           | 2.2  | 3.28E-09 |
| WHSC1          | -2.0 | 5.18E-09 |
| IL12 (complex) |      | 7.50E-09 |
| STAT4          |      | 7.89E-09 |
| IFNA1/IFNA13   | -2.0 | 1.35E-08 |
| NOS2           | -1.4 | 1.51E-08 |
| MAP3K7         | 2.2  | 2.27E-08 |
| UBA7           |      | 6.70E-08 |
| MSR1           |      | 9.64E-08 |
| USP18          | 1.1  | 1.24E-07 |
| ISGF3          |      | 1.67E-07 |
| IL17A          | -0.6 | 4.19E-07 |
| RARA           | 0.4  | 8.74E-07 |
| BAK1           | -2.0 | 9.40E-07 |
| mir-21         | 2.4  | 1.12E-06 |
| RELA           | -1.0 | 1.33E-06 |
| GAPDH          | 2.0  | 1.41E-06 |
| TNNI3          |      | 1.99E-06 |
| TLR7           | -2.2 | 2.66E-06 |
| IFNL3          |      | 2.73E-06 |

|         |      |          |
|---------|------|----------|
| KDM6B   |      | 5.99E-06 |
| BAX     | -2.0 | 6.25E-06 |
| IL4     | 1.6  | 6.64E-06 |
| MKKNK2  |      | 6.67E-06 |
| MLST8   |      | 6.67E-06 |
| LAMA5   |      | 9.18E-06 |
| FABP5   |      | 9.18E-06 |
| TREM1   | 1.2  | 1.10E-05 |
| CCR2    | 0.6  | 1.70E-05 |
| HERC5   |      | 2.00E-05 |
| MAPK9   | 0.3  | 2.61E-05 |
| PARP1   | -0.9 | 2.65E-05 |
| MMP14   |      | 2.86E-05 |
| TRPV4   |      | 3.27E-05 |
| NFKB1   |      | 3.68E-05 |
| IgG     | 0.7  | 3.93E-05 |
| MB21D1  |      | 3.99E-05 |
| CD5L    |      | 3.99E-05 |
| Ifna4   |      | 3.99E-05 |
| RETNLB  | 0.2  | 4.17E-05 |
| IGHM    |      | 4.18E-05 |
| IRF4    | 0.7  | 4.40E-05 |
| SLC9A3  |      | 4.70E-05 |
| RICTOR  | -2.4 | 5.61E-05 |
| RPSA    |      | 5.84E-05 |
| TMEM173 |      | 7.89E-05 |
| CD14    |      | 9.48E-05 |
| EP300   |      | 9.71E-05 |
| PDLIM2  | -1.0 | 9.78E-05 |
| RARRES3 |      | 9.93E-05 |
| SARM1   |      | 9.93E-05 |
| MTORC2  |      | 9.93E-05 |
| ISG15   |      | 9.93E-05 |
| TREX1   |      | 9.93E-05 |
